# Supplementary material for: Ndc1 drives nuclear pore complex assembly independent of membrane biogenesis to promote nuclear formation and growth
Source: eLife journal article supplement (doi:10.7554/elife.75513), 2022-06-16

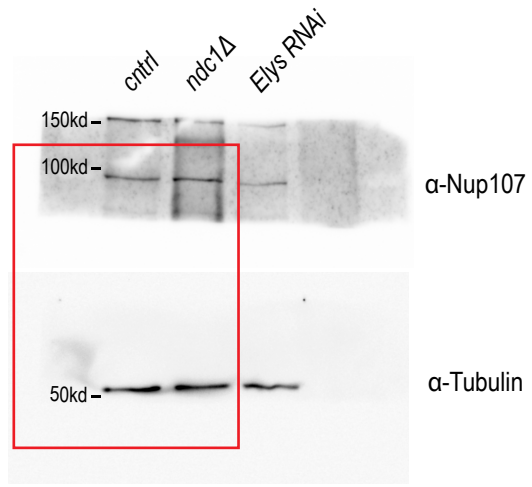

Supplement: fig3-figsupp1-data2 [file elife-75513-fig3-figsupp1-data2-v1.pdf]
