# Supplementary material for: Ndc1 drives nuclear pore complex assembly independent of membrane biogenesis to promote nuclear formation and growth
Source: eLife. 2022 Jul 19;11:e75513. doi: 10.7554/eLife.75513 (PMC9296133; doi:10.7554/eLife.75513)
Supplement: Figure 1—figure supplement 1—source data 1. [file elife-75513-fig1-figsupp1-data1.xlsx]

## Sheet: Source Data Fig S1B
Fold Change for ndc1 KO qPCR
from three biological replicates
	Control		Ndc1 KO
	1.0049		1.33e-05
	0.737334		0.000656
	1.34962		0.033599

## Sheet: Source Data Fig S1C
Nuclear Diameter of nuclei from IF staining
Nuclei	Control		ndc1 KO
1	5.4203		4.25578
2	6.44		5.07046
3	6.67		5.06261
4	6.24412		7.10278
5	7.24065		2.3
6	6.53788		4.37
7	4.37		4.48574
8	7.36		3.22411
9	6.09184		3.68
10	7.86154		5.98221
11	5.06		3.34393
12	3.22		5.64968
13	7.47898		3.68
14	7.36		3.91
15	6.90767		2.64625
16	5.5224		3.68
17	5.29		3.91
18	4.95102		5.5224
19	6.5555		4.48574
20	7.53091		2.53
21	3.91		3.91
22	6.91726		4.72131
23	7.47544		4.0324
24	6.21		4.72131
25	7.60569		4.25578
26	6.21		5.06
27	8.32996		2.07
28	5.99992		5.19098
29	6.5555		2.64625
30	6.67		2.07
31	4.04556		4.959
32	5.52		2.99
33	4.37		4.60288
34	7.13		3.80284
35	7.01924		5.54158
36	5.77072		3.45
37	5.7523		2.53
38	7.01924		5.17564
39	7.24911		4.14
40	7.24546		5.06
41	6.9		3.69439
42	6.9		5.98
43	6.44		3.91
44	6.21		4.6
45	7.59		4.14
46	4.6		4.14
47	5.06		5.29
48	6.9		3.57335
49	7.01924		7.26738
50	7.47544		4.37303
51	6.67		4.6
52	4.37		3.22
53	7.59		3.22
54	4.72131		4.49164
55	3.45		2.3
56	7.24546		5.7592
57	6.9		3.68
58	4.14		2.41637
59	4.37		3.22
60	7.59		4.7157
61	2.76479		4.14
62	5.06		5.41051
63	7.82169		4.49164
64	4.14		2.99
65	6.21		5.29
66	6.67		1.84
67	5.52		4.83
68	5.29		4.95102
69	4.37303		4.6
70	3.91338		2.53
71	6.9		5.52
72			5.2925
73			6.21852
74			3.33599
75			3.68359
76			5.29
77			3.58822
78			3.45

## Sheet: Source Data Fig S1F
Percent Embryonic Lethality Data
Worm Number	Control		ndc1 tm1845 allele
1	0.390625		41.3043
2	0		71.5909
3	0.381679		23.8806
4	0		36.5
5	0		13.2812
6	0.4329		81.4815
7	0		22.2222
8	0		75.4717
9	0.398406		54.717
10	0		45.2381
11			71.7647
12			25
13			9.67742
14			74.4681
15			72.9927

## Sheet: Source Data Fig S1G
Percent Embryonic Lethality Data
Worm Number	Control		ndc1 RNAi
1	0		2.52101
2	0		0
3	0.347222		0
4	0		0.869565
5	0		1.81818
6	0		0
7	0		1.9802
8	0		2.5974
9	0		0.485437
10	0		0
11	0		0.378788
12	0		0.492611
13	0		0.454545
14	0		0
15	0		0.714286
