# Supplementary material for: Ndc1 drives nuclear pore complex assembly independent of membrane biogenesis to promote nuclear formation and growth
Source: eLife. 2022 Jul 19;11:e75513. doi: 10.7554/eLife.75513 (PMC9296133; doi:10.7554/eLife.75513)
Supplement: Figure 1—source data 1. [file elife-75513-fig1-data1.xlsx]

## Sheet: Source Data Fig 1B
Percent Embryonic Lethality Data
Worm Number	Control		Ndc1 KO
1	0		43.4783
2	0.473934		42.8571
3	0		100
4	0		55.5556
5	0.529101		86.6667
6	0		42.7083
7	0		50.8772
8	0.454545		43.5897
9	0		72.8571
10	0		44.8598
11	0		57.1429
12	0		50.4854
13	0		100
14	0		48.4848
15	0.485437		82
16	2.72109
17	0.438596
18	0.613497
19	0
20	0.520833

## Sheet: Source Data Fig 1F
Nuclear to cytoplasmic ratios
Ratio is then multiplied by nuclear area
Time (s) Relative to PCR
	Control																				ndc1 RNAi														nup153 RNAi										Nup153 RNAi
-500	81.8006	60.2854	61.5436	136.489	160.473	51.4158	75.3984		70.9656		53.3768			75.4074	57.683	73.2188		30.0901			66.7954	13.4019	37.9371	80.685	76.9518	69.2166	15.0799	122.28	30.162		59.7774	67.3332				46.296		42.0664	63.2671	23.4773	60.6846	27.8375				9.568	3.89312	3.75435	14.4443
-480	98.989	69.3742	81.1622	149.595	166.736	60.0041	91.1845		80.5395		58.357			87.5423	65.1985	77.5035		35.4927			76.9941	15.0139	48.0609	89.5327	99.2295	86.3174	17.8318	129.222	38.5772		69.1784	113.878				58.9761		46.5729	70.1696	22.7049	75.9949	25.6017				9.63828	3.62241	3.83421	18.2493
-460	102.784	85.0717	98.1942	161.766	192.786	64.5605	124.213	127.479	88.3839		81.51		73.621	80.4089	73.6936	92.9842		40.2762			74.4672	18.6203	64.533	102.443	96.5355	107.118	25.1413	153.986	53.5956		84.3732	134.595				52.8999		56.7591	76.3857	25.5507	86.4852	32.9974				9.29914	3.90235	4.00992	17.2335
-440	114.524	93.7228	111.892	169.984	209.418	73.355	131.802	142.573	93.213		96.13	118.436	91.0517	110.401	93.2273	101.765		47.8414			80.8377	24.5291	76.6853	124.408	120.296	103.344	26.9388	184.921	58.7706		82.8599	169.071				70.4101		58.3274	75.5816	29.4702	83.4751	40.4336			4.68735	12.8818	3.86369	3.98744	20.9753
-420	130.41	102.376	118.394	195.769	225.522	80.5534	159.097	163.257	96.6562	132.493	111.932	119.336	120.203	126.387	110.935	126.775		60.2596			94.697	26.3553	93.5883	141.542	132.781	129.828	45.5749	233.739	78.4688	79.635	112.469	187.208			49.6838	81.1835		60.8365	86.5339	35.4531	94.3724	45.9765			6.56655	13.7256	3.21226	4.56669	27.4818
-400	147.134	116.139	143.396	188.082	242.834	88.9492	166.202	179.656	119.468	135.81	130.75	146.697	134.35	134.625	132.369	142.152		69.9352			123.156	32.0159	86.0407	162.724	153.398	107.593	53.1739	237.13	93.5176	94.8865	117.269	196.674			50.477	81.9763		69.4102	99.2167	37.3719	104.085	49.8808			5.54419	14.4462	3.48696	4.72716	33.7147
-380	159.379	122.105	157.747	190.637	268.227	95.198	175.075	199.154	132.326	170.39	147.09	166.162	147.164	159.662	148.082	144.026		84.659			129.873	42.3621	92.2759	182.539	166.695	148.952	76.7027	270.095	115.41	97.1112	107.717	207.349			60.3635	83.8735	100.385	78.4618	97.7185	37.8038	106.302	53.607			5.60108	17.7994	4.19167	5.70153	42.4878
-360	174.303	144.042	174.441	213.51	283.831	103.92	189.694	225.189	131.898	194.346	172.59	191.818	173.867	164.547	177.875	166.877		90.6803			158.967	43.9356	99.7241	200.443	180.273	162.467	92.5522	281.686	119.757	114.716	152.726	234.839			62.8095	99.5993	121.644	86.2016	113.902	42.1482	91.2512	67.3251			7.05374	18.7233	4.62942	5.7119	57.1189
-340	192.392	146.329	195.491	204.881	302.486	110.992	192.884	246.842	141.851	206.305	186.961	219.379	181.354	183.414	198.681	166.424	98.5454	121.49			182.785	46.913	124.995	216.159	165.81	154.746	93.0678	265.124	120.801	119.036	138.137	257.72			54.9292	76.4606	117.9	92.1827	119.385	48.54	96.6971	69.4265			8.69086	25.2796	4.90608	6.71383	69.8437
-320	211.391	171.95	201.033	212.589	337.171	120.284	197.676	292.234	169.374	220.629	214.361	238.528	209.712	196.76	207.848	194.253	127.587	127.599			152.574	63.3086	133.894	189.36	168.043	150.561	112.166	269.356	175.249	126.473	154.002	255.684			71.9519	113.867	143.781	111.07	126.038	49.0202	90.3215	74.8446			8.3577	27.6197	5.20563	5.93854	79.2376
-300	236.811	218.506	256.874	208.437	363.761	126.556	221.497	324.722	174.943	246.346	226.781	244.278	245.064	226.109	247.509	199.403	137.644	151.636			162.82	76.1537	135.92	230.756	190.932	125.3	139.708	308.372	168.545	124.251	160.271	281.634			74.7254	105.514	133.008	120.634	107.38	54.6967	97.0204	81.8962			9.74035	33.5986	4.80928	7.61305	86.3338
-280	239.897	230.223	284.03	184.947	383.017	131.88	230.985	332.448	190.601	239.24	251.435	267.927	274.919	222.657	284.296	219.257	133.972	152.751			172.63	75.2302	141.027	246.183	205.158	169.345	144.921	309.735	187.748	132.824	191.119	296.848			64.5288	104.158	126.182	130.682	112.285	51.674	98.3831	92.042			10.2524	44.518	6.29556	7.88626	98.6566
-260	254.301	248.957	299.326	176.552	352.835	154.886	224.332	328.465	237.233	288.977	259.35	268.72	279.546	256.662	289.336	236.856	142.277	170.636			167.091	98.4781	134.533	217.916	188.67	176.831	141.212	313.505	181.474	147.579	190.597	273.844			76.0361	122.332	122.652	128.723	92.7817	54.7354	94.5041	82.082			13.2622	59.531	7.64835	6.64165	94.0847
-240	267.87	244.15	282.342	152.129	406.629	160.787	245.107	333.694	237.942	301.403	280.931	286.772	276.918	274.295	298.085	260.655	162.545	194.761			165.484	99.9282	140.173	247.251	199.849	183.275	142.967	316.871	177.055	171.981	218.723	262.587			69.5522	106.923	134.359	115.572	86.8013	49.7614	110.271	78.9163			14.6089	71.7239	8.07532	8.74925	109.768
-220	263.521	289.568	305.192		401.99	164.872	255.286	344.974	252.288	318.744	314.415	324.208	319.482	311.167	275.442	292.089	186.813	205.728			180.875	111.294	142.536	245.563	215.105	202.783	141.231	286.86	194.902	180.106	225.644	307.488			84.7766	113.071	155.571	125.172	102.241	62.2269	104.384	102.218			15.9074	67.9755	7.97107	8.50993	107.685
-200	291.786	299.156	338.208		427.891	184.756	261.709	400.141	265.125	351.03	335.016	360.903	357.77	337.025	317.589	290.364	181.394	225.258			197.111	113.994	169.633	295.364	247.624	197.076		272.476	193.554	165.079	228.668	331.567			77.0384	114.817	155.292	126.664	107.723	59.0884	97.0479	91.6894			17.5616	81.1336	8.84634	10.4112	107.545
-180	300.988	282.3	340.396		398.165	194.226	253.244	357.297	292.54	396.88	356.575	368.793	368.817	353.849	307.722	316.509	188.449	244.985			204.567	107.118	176.775	285.123	259.64	199.333		262.842	222.408	170.815	234.368	317.732			91.9693	115.129	128.888	118.541	122.208		101.14	96.501			18.8879	79.2468	9.77548	9.68804	111.163
-160	293.573	287.24	358.303		387.301	218.182	242.594	358.204	279.897	405.834	366.43	370.579	336.362	357.536	307.181	309.857	175.635	224.819			199.729	126.699	178.097	291.361	268.624	164.88		227.637	266.545	158.233	235.655	359.378			85.011	130.152	126.773	147.912	115.382		92.2704	84.4294			21.9407	92.6547	10.4582	11.4626	124.544
-140	300.739	297.556	384.406		405.577	210.508	246.102	394.008	295.482	406.336	335.101	369.652	353.207	361.983	307.545	304.934	175.991	250.078			208.109	106.182	179.366	282.249	265.652	155.275		200.935	318.016	186.112	285.553	303.796			80.568	135.368	132.115	141.827	111.494		99.8282	98.5703			30.1624	107.968	13.9185	12.9174	133.505
-120	293.385	285.325	357.732		410.5	241.671	235.854	389.813	309.698	402.15	316.389	362.456	356.079	389.352	295.898	338.785	171.76	258.801			226.42	106.611	170.655	212.884	250.817	147.94			299.572	196.454	273.287	275.435			103.673	106.492	135.433	145.279	111.758			103.644			45.0425	108.469	15.9175	13.1518	129.755
-100	313.325	268.268	344.221		433.003	204.161	226.904	380.7	250.898	416.414	389.21	303.447	369.537	374.841	277.078	334.077	188.288	240.397			262.053	100.781	183.444	201.564	288.089	164.364			255.879	183.529	278.209	229.361			115.245		135.601	139.411				98.8893			49.5868	101.969	24.7479	13.57	137.003
[truncated: 5 more columns]

## Sheet: Source Data Fig 1G
Pronuclear diameter at -100s relative to PCR
	Control		ndc1 RNAi		nup153 RNAi		nup53 RNAi
	8.165		5.98		5.98		3.91
	7.82		5.175		5.75		4.37
	8.51		6.21		5.52		4.255
	8.05		6.555		5.52		3.68
	8.74		6.67		5.175		3.68
	8.51		6.44		5.175		4.025
	7.245		6.21		5.29		2.76
	7.935		6.44		5.29
	7.82		6.555		5.405
	8.165		6.095		5.29
	8.05		6.095		5.06
	8.05		6.095		5.52
	8.165				5.06
	7.935				5.175
					4.945
					5.06
					5.175
					5.52
					5.06
