# Supplementary material for: Ndc1 drives nuclear pore complex assembly independent of membrane biogenesis to promote nuclear formation and growth
Source: eLife. 2022 Jul 19;11:e75513. doi: 10.7554/eLife.75513 (PMC9296133; doi:10.7554/eLife.75513)
Supplement: Figure 2—figure supplement 1—source data 1. [file elife-75513-fig2-figsupp1-data1.xlsx]

## Sheet: Source Data Fig S2E and S2F
Normalized value for ratio of n:c NLS GFP
time (s) relative to anaphase onset	control																							ndc1 RNAi
0	0	0	0.00765081	0	0.00647481	0	0	0	0	0.0079847	0	0.0106569	0.00216567	0.00387252	0.00591773	0.0118212	0.00503235	0.00539822	0	0.00822898				0	0.00075069	0.00333097	0.0016641	0	0	0.0188507	0.0120667	0.0009019	0.0104488	0.00719862	0.00942303	0.0030376	0.00925411	0.00309392
20	0.0050271	0.00417204	0.00016913	0.00079129	0	0.00183894	0.00232254	0.00411594	4.8594e-05	0	0.00657736	0.00383952	0.00428697	0.00058303	0	0.00308991	0.00308301	0.0110346	0.00106557	0.00141439				0.00231265	0.0118159	0.00228386	5.9247e-05	0.00440894	0.00878992	0.0122991	0.00740562	0.00374562	0.00528243	0.00329293	0.0068393	0	0	0.00547879
40	0.00447367	2.7907e-05	0.00544184	0.00153361	0.00213295	0.00394987	0.00345076	0.0037507	0.00114699	0.00214921	0.00216662	0.00045668	0.00101994	0.00429682	0.00378785	0.00229677	0.00168543	0	0.00125472	0				0.00384858	0	0.00215469	0.00091356	0.00060712	0.0131462	0	0	0	0	0	0.00065453	0.0156726	0.00976972	0
60	0.00702605	0.00827751	0	0.00649795	0.00446868	0.00425205	0.00309417	0.00263019	0.00015843	0.00367811	0.00046708	0	0	0	0.00050861	0	0	0.00439005	0.00967086	0.00541034				0.00758915	0.00084054	0	0	0.0015998	0.0144056	0.00528364	0.00110525	0.00255723	0.00403478	0.00403138	0	0.0158341	0.0156189	0.00206367
80	0.00960931	0.0121356	0.00556318	0.028082	0.00869235	0.00965433	0.00669001	0.00617246	0.0069677	0.00828019	0.00505784	0.00445012	0.00149849	0.00783325	0.00202387	0.00322615	0.0154502	0.0107641	0.0297652	0.0302997				0.0108512	0.00094027	5.0085e-05	0.00222069	0.00622619	0.0106698	0.00873547	0.010238	0.00247693	0.013924	0.005171	0.00760592	0.0166818	0.00743854	0.00318273
100	0.0317467	0.0345313	0.0219768	0.0457159	0.0341624	0.0210095	0.0204728	0.0173465	0.0271775	0.0284006	0.0223925	0.0256563	0.00746747	0.0267202	0.00966178	0.0258301	0.0338603	0.0323403	0.0400717	0.0550427				0.0129687	0.0110591	0.0122433	0.0108672	0.0049639	0.0195519	0.0121142	0.0260541	0.0177761	0.0025112	0.00751519	0.00674975	0.0223707	0.00553299	0.00726226
120	0.0427194	0.0456143	0.0395617	0.0539076	0.0624636	0.0374796	0.0466915	0.0346672	0.0466961	0.0428538	0.0389055	0.0440811	0.0368523	0.0475186	0.0262594	0.04433	0.0475356	0.0603851	0.0701397	0.0648969				0.00957798	0.0230205	0.0241771	0.0173191	0.0192803	0.0379597	0.0173112	0.0342297	0.0314685	0.0173539	0.0121789	0.010236	0.0352546	0.015616	0.0146422
140	0.0684585	0.0848072	0.0646913	0.0969433	0.0895267	0.0523034	0.0699747	0.0543045	0.0722388	0.0601776	0.0593404	0.0755676	0.0597517	0.0715946	0.0445197	0.0650466	0.0730628	0.101037	0.116489	0.11901				0.0255237	0.0249658	0.0382284	0.0217989	0.0296303	0.0595661	0.0370921	0.0481806	0.0503368	0.0286699	0.0282905	0.0145481	0.0633197	0.0467949	0.0243711
160	0.0841894	0.11659	0.114223	0.128614	0.108754	0.0807723	0.114676	0.0981629	0.119325	0.0961942	0.094296	0.0994019	0.090344	0.085359	0.0695236	0.0724795	0.0978282	0.13686	0.122405	0.157162				0.0401335	0.0458408	0.0594828	0.0332688	0.0397127	0.111036	0.063523	0.0849041	0.0591191	0.0470504	0.040686	0.027185	0.100274	0.0725687	0.0464756
180	0.110667	0.148347	0.142733	0.203064	0.127399	0.101272	0.158182	0.126657	0.157588	0.139248	0.129077	0.135845	0.118095	0.114948	0.0796993	0.143071	0.0959547	0.152332	0.140136	0.225371				0.0629908	0.0716078	0.0736325	0.0502313	0.0683639	0.13334	0.0747332	0.143963	0.104301	0.0759987	0.0661476	0.0655168	0.120304	0.0803452	0.0747435
200	0.146325	0.180263	0.172361	0.252208	0.190101	0.133415	0.216713	0.143341	0.20108	0.167047	0.149289	0.17527	0.146635	0.112406	0.111544	0.182732	0.136806	0.211488	0.187937	0.296518				0.0620175	0.0847886	0.108959	0.0555567	0.0878708	0.179397	0.0926233	0.147327	0.124123	0.0919607	0.078437	0.081456	0.155342	0.0870285	0.101585
220	0.208903	0.219701	0.188435	0.311587	0.279083	0.165878	0.260859	0.156292	0.223135	0.209699	0.212472	0.225341	0.146897	0.162843	0.136531	0.234475	0.163907	0.252829	0.208282	0.338323				0.119794	0.135165	0.133235	0.0892044	0.140791	0.213826	0.120185	0.212791	0.157627	0.117323	0.117889	0.139436	0.163179	0.121409	0.113022
240	0.274345	0.315665	0.26248	0.379874	0.323604	0.226257	0.33144	0.195497	0.228582	0.252083	0.235322	0.271783	0.208444	0.169384	0.166788	0.291864	0.197745	0.285919	0.270166	0.389228				0.143642	0.175327	0.167373	0.107166	0.185548	0.278135	0.155778	0.258287	0.196953	0.147522	0.155302	0.137789	0.214294	0.152111	0.156644
260	0.307187	0.373337	0.311064	0.41529	0.381908	0.30539	0.38616	0.219479	0.2811	0.312549	0.278182	0.307996	0.243448	0.206982	0.188683	0.374732	0.24215	0.322464	0.328912	0.45429				0.201102	0.245181	0.225966	0.135438	0.25094	0.307555	0.239527	0.379214	0.273522	0.16255	0.17729	0.209687	0.245547	0.190668	0.224168
280	0.379985	0.401852	0.345336	0.457282	0.458034	0.363514	0.474995	0.25537	0.29232	0.342796	0.372944	0.350811	0.286915	0.278772	0.210693	0.359161	0.284798	0.37643	0.409171	0.496096				0.226462	0.283002	0.311043	0.174628	0.311825	0.354621	0.293609	0.451119	0.305997	0.173224	0.274165	0.305745	0.30526	0.282538	0.274104
300	0.38768	0.501185	0.406795	0.542049	0.501506	0.391096	0.517182	0.293375	0.377298	0.407167	0.394122	0.393493	0.344085	0.367321	0.261327	0.455738	0.36999	0.465203	0.450631	0.6653				0.324591	0.342709	0.329827	0.195293	0.38783	0.468544	0.369881	0.526153	0.346024	0.262553	0.3119	0.35657	0.353737	0.329317	0.348522
The average was taken for each group then the difference between each timepoint was taken.
