# Supplementary material for: Ndc1 drives nuclear pore complex assembly independent of membrane biogenesis to promote nuclear formation and growth
Source: eLife. 2022 Jul 19;11:e75513. doi: 10.7554/eLife.75513 (PMC9296133; doi:10.7554/eLife.75513)
Supplement: Figure 2—source data 1. [file elife-75513-fig2-data1.xlsx]

## Sheet: Source Data Fig 2F
Nuclear to cytoplasmic ratios
Ratio is then multiplied by nuclear area
Time (s) relative to anaphase onset
	Control																						ndc1 RNAi
0	6.70052	7.33778	12.2881	7.04865	10.4717	5.17666	5.90284	8.86447	10.2782	8.59493	7.30577	14.1269	10.0328	7.78683	10.8014	15.9762	11.09	6.83089	6.28411	10.641			5.83298	7.36444	9.45178	6.24265	5.00831	5.40775	8.87917	6.96713	7.30702	7.22602	9.13062	6.79052	6.06263	8.87927	7.3273
20	8.67759	9.0842	8.72505	7.30477	8.34824	5.98763	6.73078	10.4959	10.2994	6.35793	9.48438	11.1971	10.668	6.53776	8.16359	10.9558	10.2537	8.68986	6.63348	8.10567			6.64859	11.2048	9.09893	5.5111	6.17654	7.08519	7.5686	5.91108	8.44704	6.40519	8.35247	6.3013	5.61194	7.09272	8.27798
40	8.45994	7.34946	11.2361	7.54504	9.04775	6.91854	7.13297	10.3511	10.7791	6.96005	8.02342	9.74326	9.68967	7.94794	9.852	10.4998	9.65403	5.05048	6.6955	7.57945			7.19027	7.1039	9.0554	5.90053	5.16918	7.91654	5.10829	4.23322	6.94546	5.56592	7.69641	5.13022	7.93728	8.97881	6.09398
60	9.46374	10.8028	8.64451	9.15187	9.81376	7.0518	7.00585	9.90698	10.3474	7.38839	7.46048	9.547	9.38425	6.31638	8.3903	9.17915	8.9309	6.49838	9.45491	9.59234			8.50946	7.39562	8.32932	5.4841	5.43221	8.15686	6.16522	4.48363	7.97063	6.20696	8.49959	5.00628	7.96125	10.108	6.91661
80	10.4797	12.4177	11.2939	16.1381	11.1989	9.43419	8.28769	11.311	13.3211	8.67772	8.98107	11.4595	9.83297	9.29077	9.06572	11.0341	15.5598	8.60063	16.0433	18.8523			9.65991	7.43023	8.3462	6.49636	6.65805	7.44394	6.85572	6.55281	7.93843	7.77816	8.72665	6.44646	8.08702	8.52877	7.36271
100	19.1859	21.7926	19.1107	21.8457	19.552	14.4418	13.201	15.74	22.1471	14.3147	14.7228	20.5729	11.6203	16.4624	12.4703	24.0311	23.4586	15.7168	19.4225	28.0577			10.4067	10.9421	12.455	10.4377	6.32359	9.13897	7.5316	10.1362	14.0717	5.9649	9.19369	6.28434	8.93109	8.16089	8.98892
120	23.5013	26.432	27.4853	24.4972	28.8335	21.7051	22.5474	22.6053	30.6712	18.3639	20.1924	28.4911	20.4195	24.3599	19.8686	34.6683	29.3259	24.9664	29.2809	31.7239			9.21087	15.0935	16.4764	13.3788	10.117	12.6518	8.57121	11.9885	19.5609	8.32309	10.1229	6.94445	10.8427	10.1075	11.9308
140	33.624	42.8382	39.453	38.4267	37.7089	28.2423	30.8474	30.3888	41.8261	23.2174	26.961	42.0226	27.2766	33.5019	28.008	46.58	40.2783	38.374	44.4777	51.8565			14.8345	15.7687	21.2114	15.4208	12.8594	16.7751	12.5282	15.1493	27.125	10.121	13.3328	7.76094	15.0067	16.1267	15.809
160	39.8107	56.1425	63.0418	48.6779	44.0147	40.797	46.7825	47.7727	62.3894	33.3079	38.5393	52.2655	36.4373	38.7284	39.1533	50.8539	50.9039	50.1891	46.4173	66.0505			19.987	23.0137	28.3736	20.6492	15.5309	26.5974	17.8154	23.4696	30.6457	13.0413	15.8024	10.1537	20.4896	21.1025	24.6205
180	50.2239	69.436	76.6193	72.7751	50.1294	49.8371	62.2915	59.0669	79.0995	45.37	50.0597	67.9271	44.7472	49.9639	43.6891	91.4429	50.1	55.2917	52.2307	91.4272			28.0481	31.9566	33.1417	28.3813	23.1226	30.854	20.0578	36.8504	48.7589	17.6405	20.8753	17.4118	23.4614	22.6038	35.8889
200	64.2477	82.7961	90.7298	88.6821	70.6927	64.0121	83.1566	65.6795	98.0929	53.1581	56.7546	84.8701	53.2934	48.9985	57.8835	114.247	67.6274	74.8024	67.9033	117.897			27.7049	36.5312	45.0458	30.8088	28.2913	39.6433	23.6366	37.6126	56.7052	20.1766	23.3237	20.4299	28.6601	23.894	46.5889
220	88.8583	99.3048	98.3845	107.901	99.875	78.3285	98.8936	70.8129	107.725	65.1076	77.6827	106.389	53.3717	68.1501	69.0215	143.999	79.2547	88.4374	74.5739	133.45			48.0812	54.0152	53.2264	46.1466	42.3136	46.2136	29.15	52.4445	70.1364	24.2061	31.1839	31.4084	29.8228	30.5313	51.1478
240	114.596	139.476	133.648	130.004	114.476	104.955	124.054	86.3523	110.104	76.9819	85.2511	126.347	71.8017	70.6337	82.5081	176.997	93.7727	99.3509	94.864	152.389			56.4917	67.9542	64.7298	54.3342	54.1727	58.486	36.27	62.7523	85.9021	29.0042	38.6379	31.0964	37.4068	36.4585	68.5367
260	127.512	163.617	156.785	141.468	133.597	139.853	143.561	95.8581	133.039	93.9222	99.4479	141.91	82.2835	84.9103	92.268	224.645	112.825	111.404	114.125	176.595			76.7562	92.1981	84.4743	67.2217	71.4995	64.1004	53.023	90.1503	116.598	31.3917	43.0187	44.7103	42.0438	43.9021	95.4538
280	156.142	175.553	173.107	155.059	158.563	165.485	175.228	110.084	137.939	102.396	130.836	160.31	95.2995	112.17	102.079	215.692	131.123	129.203	140.44	192.149			85.7001	105.324	113.143	85.0857	87.6322	73.0823	63.8414	106.441	129.617	33.0877	62.3194	62.8988	50.9034	61.6381	115.36
300	159.168	217.134	202.376	182.496	172.819	177.649	190.267	125.148	175.05	120.43	137.85	178.653	112.419	145.793	124.648	271.222	167.674	158.481	154.033	255.1			120.307	126.047	119.473	94.5058	107.771	94.823	79.0988	123.442	145.663	47.2802	69.8374	72.5223	58.0959	70.6689	145.025
320	182.012	237.397	241.213	206.278	178.303	203.26	235.569	157.847	219.971	151.181	153.576	217.994	132.058	156.187	138.732	299.167	207.13	182.951	180.074	270.855			149.696	136.895	141.025	123.35	122.922	107.353	88.8157	151.575	191.018	58.2724	84.5338	79.2963	71.2729	85.0909	172.844
340	185.812	262.33	274.559	242.208	210.583	231.911	260.184	162.791	245.45	169.515	182.356	244.031	148.575	164.884	169.445	349.356	234.798	191.122	216.259	302.173			159.762	175.548	163.449	138.646	151.194	118.054	109.097	173.571	206.057	65.3644	113.125	87.5982	81.8926	96.8017	215.323
360	219.839	305.561	308.093	266.167	241.135	256.496	282.992	212.028	302.565	193.174	179.855	256.843	183.749	232.997	193.008	356.195	284.433	191.878	274.441	340.11			192.647	195.736	202.495	182.249	166.541	137.296	113.671	185.059	228.558	90.0725	114.132	103.087	79.4905	142.164	205.477
380	227.815	319.413	358.173	276.79	260.932	297.156	304.088	264.741	334.016	201.977	216.735	305.164	195.759	249.48	213.861	408.821	303.22	237.325	308.437	379.623			245.471	216.68	217.861	185.954	188.538	159.694	130.826	191.778	265.219	104.966	135.828	117.085	90.4824	155.642	204.216
400	263.523	324.034	383.046	283.173	275.513	345.849	343.274	319.952	365.422	257.75	234.678	346.347	206.164	285.806	248.466	430.348	316.497	276.366	300.567	346.374			225.267	247.981	218.128	232.748	204.563	159.612	149.132	203.992	288.539	111.39	164.209	128.833	86.3103	147.876	349.866
420	300.598	354.482	404.877	285.071	283.729	390.687	362.382	355.096	410.732	254.323	259.188	388.521	213.845	314.417	264.76	486.86	404.141	274.339	320.149	325.141			231.159	262.481	238.959	316.192	222.903	184.502	163.798	221.331	315.347	126.247	164.864	138.894	97.8965	170.136	394.785
440	303.119	372.893	465.616	308.048	313.176	431.351	343.476	360.817	431.078	265.078	299.564	398.658	228.977	369.073	312.63	531.539	403.482	286.392	334.156	378.354			317.367	278.478	277.477	300.125	229.563	194.265	192.066	220.263	338.554	126.273	196.929	156.945	107.186	163.963	403.025
460	309.868	349.888	484.884	330.723	278.177	436.353	354.07	381.296	445.549	276.971	305.321	430.094	262.348	365.378	335.677	584.166	437.978	282.289	276.897	359.309			320.501	318.182	292.154	430.138	250.543	182.827	205.147	223.03	349.384	122.167	199.215	166.145	112.944	175.336	404.723
480	338.458	337.543	440.02	309.022	299.434	420.357	322.917	405.228	427.526	286.519	338.535	404.766	282.725	360.49	414.505	569.633	366.598	296.737	300.231	322.964			358.506	334.273	288.421	461.32	248.551	196.244	193.989	230.799	392.047	147.362	199.246	170.146	121.854	188.448	322.047
500	342.631	342.483	444.713	320.173	304.569	446.174	336.917	395.469	446.994	247.973	321.962	439.303	290.788	386.03	453.907	514.402	348.971	305.454	265.542	280.72			341.36	350.667	305.984	321.858	255.98	166.363	204.801	214.185	407.836	157.396	206.93	188.294	121.925	169.942	276.634
520	320.919	395.386	414.551	313.898	336.303	437.034	288.829	353.03	392.667	231.647	320.736	408.409	308.829	323.44	405.114	447.039	302.667	297.554	322.205	281.184			354.343	295.03	310.497	220.919	269.977	150.695	182.62	198.561	361.331	157.897	181.051	183.997	131.14	192.699	235.076
540	351.153	397.897	435.472	325.553	314.966	405.951	339.807	297.039	342.682	207.37	277.835	347.059	282.865	344.426	362.182	423.557	281.114	331.953	275.536	309.558			324.119	332.544	298.917	222.964	194.153	147.765	191.569	195.077	296.064	161.634	148.14	171.424	153.982	176.657	253.884
560	399.983	399.918	407.621	321.743	334.879	310.563	323.72	301.1	329.114	187.576	269.417	362.59	274.722	259.226	326.747	477.702	275.288	334.865	299.9	284.211			320.154	354.171	345.305	235.839	164.415	155.887	167.939	207.705	265.74	164.445	141.724	168.159	137.359	193.573	218.745
580	351.539	408.03	373.739	260.028	327.289	294.632	288.271	302.011	347.424	178.98	238.363	326.031	248.315	240.298	295.172	429.374	291.486	311.019	271.795	276.009			297.951	321.139	328.714	276.413	178.809	162.869	190.928	200.531	243.416	151.626	130.959	194.355	129.617	195.98	236.798
600	290.678	425.939	398.302	271.712	326.368	285.418	271.437	323.426	343.434	188.36	260.509	338.874	258.29	277.605	283.746	406.228	284.025	261.458	234.561	254.82			288.495	327.312	252.841	275.662	184.657	165.035	174.639	202.174	270.845	145.173	158.235	179.658	148.681	200.148	169.104
