# Supplementary material for: Ndc1 drives nuclear pore complex assembly independent of membrane biogenesis to promote nuclear formation and growth
Source: eLife. 2022 Jul 19;11:e75513. doi: 10.7554/eLife.75513 (PMC9296133; doi:10.7554/eLife.75513)
Supplement: Figure 3—figure supplement 1—source data 1. [file elife-75513-fig3-figsupp1-data1.xlsx]

## Sheet: Source Data Fig S3D
number of nup160 GFP cytoplasmic puncta
time relative to PCR	Control																									ndc1 RNAi
-300		27	41	28	16	10	76	26	15	18	5	30	19	93												2	13	16	3	4	5	2	6	2	2	11		4	3	7	9	3		4
-100		17	14	15	9	6	63	23	8	13	4	21	11	91												3	8	11	1	0	1	2	3	2	3	7	3	5	3	19	9	3	8	9
100		0	2	0	0	1	7	3	1	1	0	3	0	6												2	2	10	2	1	2	0	0	2	2	0	3	0	0	2	2	2	4	1

## Sheet: Source Data Fig S3E
Sample	NE to cytoplasmic ratio for Nup107 staining
	control		ndc1 KO
1	2.89258		2.01657
2	2.22865		1.8858
3	3.7057		1.87802
4	2.79395		2.37012
5	2.219		1.48008
6	1.80879		1.05757
7	3.11272		1.08526
8	2.119		1.03834
9	3.5746		1.47523
10	2.92386		1.43079
11	2.41425		1.3497
12	2.46245		1.23591
13	2.11177		1.30788
14	2.16209		1.63046
15	2.14051		1.71456
16	1.89381		1.45914
17	2.27913		1.50888
18	2.89409		1.82677
19	2.38832		1.61821
20	1.92504		1.67372
21	3.29077		1.29378
22	2.35209		1.43077
23	3.06154		1.73551
24	2.73357		1.70413
25	2.6552		2.40984
26	2.43561		1.83172
27	2.62509		1.78142
28	2.93871		2.33071
29	3.30234		2.10928
30	2.60916		1.95367
31	1.65806		1.28991
32	2.42791		1.16845
33	1.93776		1.25056
34	3.17573		0.960335
35	3.28798		1.46121
36	2.70605		1.36712
37	1.88126		1.24387
38	2.21545		1.29099
39	2.37891		1.65041
40	2.06357		1.5826
41	2.40617		1.32684
42	1.53042		1.64855
43	2.95823		1.64855
44	1.88063		1.48591
45	1.73916		1.91261
46	2.5482		1.17989
47	2.17236		1.87527
48	3.15063		1.75077
49			2.68374
50			1.77258

## Sheet: Source Data Fig S3F
Sample	NE to nucleoplasmic ratio for elys staining
	control		ndc1 KO
1	0.844427		0.934198
2	1.50005		1.10979
3	0.736985		1.13208
4	1.72947		0.847253
5	0.927471		1.30001
6	1.10714		1.08208
7	2.1115		0.970882
8	1.58025		1.04799
9	1.71458		1.54363
10	1.46028		0.742378
11	1.85095		1.50543
12	1.10613		0.617258
13	1.47816		0.736256
14	0.800469		1.56843
15	1.53177		0.872161
16	1.11264		0.906358
17	1.07798		0.904112
18	1.86138		0.930147
19	1.08387		1.49556
20	1.55695		0.68572
21	1.57193		1.29869
22	1.74282		0.948994
23	1.5771		1.22914
24	1.70794		0.492712
25	1.93416		1.24381
26	1.6671		0.654323
27	1.85045		1.07091
28	1.71362		1.26384
29	1.79622		1.29511
30	1.92501		1.21064
31	1.57239		0.932938
32	1.22505		1.50977
33	2.27939		1.39731
34	1.16998		1.38342
35	1.85363		0.943922
36	1.66119		1.42485
37	1.65651		1.67883
38	1.27476		2.01298
39	1.23244		0.82021
40	1.69635		1.10316
41	1.55056		1.10371
42	1.43629		0.916695
43	1.64401		0.611738
44	1.50713		1.40874
45	1.62571		1.11808
46	1.6928		1.44977
47	1.87859		1.57953
48	0.885872		1.43107
49	1.52502		1.16065
50	1.36514		1.32127
51	1.81794
52	1.3737
53	1.13084
54	1.14356
55	1.35261
56	1.78184
57	1.36353
58	1.24767
59	1.29773
60	1.68759
61	1.30817
62	1.16446
63	2.16074
64	1.81267
65	1.85219
66	2.29874
67	1.52835
68	1.63065
69	1.78274
70	1.258
71	1.65304
72	1.64026
73	1.38769
74	2.18473
75	1.76412
76	1.87775
77	1.71557
78	1.75441
79	1.68298
80	1.39723
81	1.72176
82	1.93393
83	1.07221
84	1.46148
85	1.34608
86	1.61035
87	1.72929
88	1.30915
89	1.64419
90	1.4857
91	1.2968
