# Supplementary material for: Ndc1 drives nuclear pore complex assembly independent of membrane biogenesis to promote nuclear formation and growth
Source: eLife. 2022 Jul 19;11:e75513. doi: 10.7554/eLife.75513 (PMC9296133; doi:10.7554/eLife.75513)
Supplement: Figure 3—figure supplement 2—source data 1. [file elife-75513-fig3-figsupp2-data1.xlsx]

## Sheet: Source Data Fig S4A
Sample	NE to cytoplasmic ratio for Nup53 staining
		control		ndc1 KO
		1.75282		1.15464
		1.70876		1.18187
		2.18574		1.20159
		1.92476		1.2547
		2.06723		1.07396
		1.26887		1.10095
		1.72377		1.06891
		2.28773		1.12174
				1.1569
		1.56526		1.29604
		1.68927
		2.2222		0.971535
		1.83329		1.09271
		1.4986		1.03561
		2.0148		0.843729
		1.76699		0.95292
				1.07781
		1.32595		1.25444
		1.63631		1.1366
		1.97125		1.30124
		1.90056
		1.86924		1.36756
		1.31792		1.09785
		1.58162		1.04737
		1.30291		1.19051
		1.7386		1.26093
		1.44936		1.76855
		1.38776		1.29756
		1.96559		1.03453
				0.943601
		1.62801		0.891572
		1.38598		1.33379
		1.16388		1.27028
		1.44236		1.34282
		1.53474		1.29114
		1.22665
		1.47024		1.27044
		1.36609		1.31409
		1.68278		1.18652
				1.22653
				1.19891
				1.36748
				1.62477
				1.15726
				1.17655
				1.1654
				1.22733
				1.60492
				1.26344
				1.2947

## Sheet: Source Data Fig S4C
line scan values for mab414 staining
Position along line (microns)	control																								ndc1 ko
0	154.627	243.604	431.457	144.639	538.343	232.507	183.098	170.99	310.152	182.854	351.809	237.887	149.352	108.057	385.351	414.513	315.512	203.396	278.924	191.62	252.269	268.234	315.746		230.732	379.397	280.541	278.571	247.474	243.019	373.064	257.015	196.855	199.625	299.462	163.124	331.541	117.477	205.95	226.344	175.464	126.124	90.0407	85.5735	108.671	391.709	179.79	246.285	377.923
0.23	149.597	261.335	416.649	152.101	509.051	232.772	173.992	172.868	310.581	187.465	368.362	249.497	144.45	107.366	399.854	394.062	310.641	213.844	292.955	206.545	251.193	296.014	308.091		230.832	362.927	263.644	243.967	261.108	262.271	360.375	266.303	169.279	191.982	299.099	187.837	329.847	114.471	227.326	230.052	184.961	133.273	80.2675	87.2252	114.331	395.59	187.491	222.294	339.104
0.46	152.764	246.001	483.323	157.207	546.337	230.001	151.554	180.168	313.015	180.227	357.504	238.276	147.563	104.21	406.17	382.288	320.234	201.385	272.861	212.91	241.793	330.995	317.188		227.374	318.043	281.554	244.293	266.024	259.736	335.949	270.755	181.646	194.961	312.71	202.188	376.771	102.373	225.482	221.677	187.4	115.653	81.2124	82.8082	105.252	375.713	176.46	264.785	332.169
0.69	149.794	235.046	467.302	153.674	588.349	248.4	151.638	184.666	305.874	182.013	355.049	244.886	146.879	104.426	380.045	393.485	327.582	198.259	281.174	219.594	257.319	352.415	337.254		240.72	324.555	269.161	268.409	251.551	238.682	339.699	252.534	197.3	215.113	327.759	179.591	372.668	91.5248	221.617	227.427	193.911	133.39	92.2553	98.1908	103.057	357.932	188.493	303.191	314.141
0.92	160.858	240.192	439.759	162.181	553.987	249.037	162.525	164.835	328.206	198.114	377.042	247.331	163.117	108.645	343.369	425.237	312.129	191.907	301.163	238.81	249.629	394.757	362.61		255.396	333.253	294.887	269.579	246.425	228.941	368.873	251.902	196.048	234.519	320.947	191.771	382.203	84.6016	220.187	232.456	188.24	118.937	88.4528	93.1945	116.053	368.03	218.389	305.91	343.563
1.15	153.514	240.868	449.904	178.984	544.863	248.297	156.026	167.363	361.317	207.113	379.948	239.998	155.918	116.511	340.582	392.166	306.864	196.501	322.303	236.513	255.125	435.627	408.167		237.022	347.398	316.096	297.711	250.326	228.14	398.375	238.225	193.446	264.061	305.145	193.906	381.408	87.1759	226.651	236.387	192.717	127.129	86.1678	98.0915	121.077	373.918	224.112	292.172	350.332
1.38	151.538	243.482	482.465	189.693	586.879	250.974	155.207	183.76	367.445	219.792	385.584	239.553	149.997	110.605	366.707	356.595	342.4	190.154	319.144	225.509	242.584	475.648	423.792		231.136	333.513	316.006	300.114	262.208	256.209	406.569	218.011	198.844	283.782	317.506	214.822	377.864	93.595	223.113	250.783	201.516	124.315	87.4847	106.959	106.357	394.448	228.853	292.055	348.755
1.61	144.397	240.408	486.02	187.244	727.942	263.599	152.915	199.246	349.27	221.576	389.359	279.22	143.472	117.637	370.315	353.64	370.665	211.186	380.177	226.815	255.987	488.758	499.425		233.586	340.521	303.631	280.886	264.239	266.489	391.108	226.477	205.978	296.845	336.081	221.115	358.033	102.332	237.608	277.017	210.209	109.545	99.8453	107.095	118.098	412.046	243.745	292.487	323.541
1.84	178.511	250.714	574.103	207.379	1013.42	307.286	186.258	239.271	369.493	285.695	437.213	350.387	175.209	125.377	457.869	397.081	360.006	272.932	475.295	249.371	277.248	497.605	589.698		256.801	362.698	314.448	295.69	267.929	315.086	415.917	272.524	214.254	305.987	374.531	221.147	381.91	121.299	299.625	319.58	237.467	104.974	110.262	117.492	150.276	470.465	286.336	315.775	308.948
2.07	316.496	290.652	810.917	304.252	1558.87	462.796	327.357	455.524	552.718	558.117	630.037	577.611	357.833	187.083	651.094	567.934	435.287	491.184	788.614	340.847	460.146	587.655	745.602		345.311	479.882	501.557	460.089	341.521	366.847	558.552	418.109	266.658	293.922	461.364	350.396	524.596	224.981	499.751	509.124	324.823	143.606	121.365	167.083	256.979	669.46	394.461	386.895	420.949
2.3	642.992	567.382	1250.01	628.986	2210	1004.03	668.332	1094	1241.06	1114.13	1069.12	943.218	645.245	317.516	855.786	1144.52	965.979	799.741	1280.15	624.102	925.451	994.752	1114.71		528.66	702.535	867.12	848.342	528.693	501.214	997.598	762.479	412.129	440.946	750.413	761.682	842.618	413.447	740.054	979.007	535.679	241.746	163.146	197.772	493.755	1069.46	666.34	592.449	677.055
2.53	784.909	899.043	1391.42	949.949	2330.17	1404.65	915.161	1738.15	1948.21	1398.8	1353.55	1143.28	681.044	422.267	986.273	1740.06	1727.88	904.59	1424.44	883.091	1264.64	1532.89	1300.97		650.73	849.079	1102.8	1048.77	651.909	717.429	1285.15	1053.1	505.065	727.281	936.903	1029.39	1005.7	484.81	868.156	1121.43	643.552	269.75	188.081	201.38	684.364	1297.1	813.165	801.252	796.998
2.76	662.877	790.312	1038.45	798.199	1985	1054.51	748.14	1465.17	1596.57	1152.27	1218.2	1069.66	537.151	349.434	784.09	1536.41	1485.18	747.808	1248.98	737.221	943.481	1463.02	1103.66		584.789	723.009	940.865	894.301	579.591	684.831	1023.39	994.434	446.128	743.575	780.352	890.13	898.402	391.869	683.832	801.483	523.496	218.213	163.975	156.026	544.647	1211.31	680.275	738.39	632.659
2.99	485.959	615.809	805.043	609.073	1712.31	717.94	504.313	849.749	845.485	817.431	983.283	866.887	464.63	254.423	598.327	1161.83	818.237	536.419	920.892	592.593	680.308	1224.46	828.192		458.636	558.391	680.145	691.176	487.219	538.923	787.091	796.972	402.591	616.412	622.024	831.359	737.423	308.56	547.386	598.61	418.808	186.478	150.391	140.136	386.754	1066.49	573.745	622.324	487.677
3.22	404.815	555.643	702.242	526.68	1410.66	615.456	388.361	509.151	550.88	635.431	876.938	679.387	419.899	229.366	539.886	879.541	497.183	415.086	703.375	479.118	592.671	1081.97	636.355		404.39	510.964	538.604	613.183	431.205	466.539	658.104	689.839	379.627	562.119	595.814	812.838	631.962	271.63	485.87	488.577	388.925	153.352	129.958	145.802	306.672	992.557	560.347	533.251	481.769
3.45	368.016	517.062	624.912	489.256	1172.98	584.08	347.885	344.969	440.46	537.117	799.298	588.831	376.878	225.131	514.776	742.015	386.069	391.547	612.695	395.291	557.596	1073.22	526.855		375.138	550.722	473.484	574.546	407.691	465.319	595.583	654.773	363.31	562.231	570.915	801.789	596.12	266.088	445.741	428.431	382.361	129.395	130.8	144.674	239.165	978.598	563.738	495.649	480.08
3.68	386.326	490.227	608.041	462.395	1018.86	591.857	318.494	290.282	385.489	479.163	746.123	554.608	363.997	209.947	478.985	696.2	324.827	370.167	569.993	375.167	506.664	1087.73	477.014		391.351	563.712	447.273	539.207	400.679	466.967	559.938	618.65	360.584	567.559	578.987	799.311	601.57	279.56	432.296	402.764	378.286	132.153	147.625	134.823	207.234	895.659	537.221	486.23	511.418
3.91	355.635	470.673	535.513	441.714	893.114	608.771	298.056	237.188	338.954	458.031	691.207	509.831	368.391	197.048	481.681	686.84	279.761	350.285	524.424	353.909	505.542	1058.98	462.228		429.02	532.63	451.445	502.26	389.041	462.353	525.576	599.573	347.98	600.133	605.259	800.73	627.622	269.333	407.027	353.531	374.053	128.447	143.97	133.567	207.935	854.778	495.245	516.103	534.075
4.14	334.828	413.279	528.936	427.024	807.248	600.191	283.962	221.135	309.881	461.51	680.709	463.775	362.988	183.886	471.406	658.322	241.683	338.851	499.165	327.492	499.197	1091.06	459.574		437.399	560.5	433.134	523.429	386.101	430.315	511.032	572.655	331.253	565.532	595.704	772.675	631.587	269.322	394.511	362.951	398.909	113.031	123.37	136.564	225.107	855.237	475.985	514.24	513.539
4.37	335.387	399.53	530.909	434.002	738.746	608.597	263.832	201.064	318.221	461.14	638.862	448.22	351.267	176.145	495.116	605.669	234.743	345.703	474.54	307.241	530.562	1061.28	479.253		472.582	547.434	404.803	508.027	396.859	399.536	517.072	548.202	331.941	535.692	584.271	774.27	621.102	265.051	381.07	385.247	365.991	126.014	127.836	151.034	218.535	912.914	467.966	490.752	511.696
4.6	321.898	403.154	533.342	474.754	635.886	601.258	265.644	182.879	334.913	470.591	575.947	418.942	349.596	177.25	501.14	609.412	220.154	340.419	478.701	304.504	517.768	1121.53	482.043		484.704	523.775	382.988	502.601	383.363	396.566	525.725	513.365	323.948	517.191	570.768	821.939	619.328	255.365	393.853	400.528	346.951	135.159	124.658	165.289	223.372	981.813	469.835	503.032	504.84
4.83	330.494	424.857	518.355	506.94	628.095	597.484	268.74	184.788	311.192	466.484	594.4	388.498	338.37	198.207	494.317	612.995	204.207	322.108	455.855	295.391	534.273	1204.48	494.208		516.013	505.291	360.623	507.27	377.927	399.095	515.502	514.128	339.567	508.72	563.479	876.212	614.992	254.014	402.058	405.328	344.324	118.861	124.381	151.828	228.891	998.769	468.021	507.379	474.626
5.06	335.794	435.512	514.328	518.325	603.907	684.95	274.041	175.628	319.275	462.375	606.662	384.276	346.946	184.098	454.682	582.446	179.726	348.076	439.913	311.296	558.955	1252.23	537.441		536.399	472.381	359.276	523.644	396.751	433.227	494.2	529.396	344.478	497.04	565.324	862.852	639.635	248.289	413.58	424.423	340.291	120.846	115.796	166.832	245.21	1073.5	481.122	557.497	497.899
[truncated: 4 more columns]
