# Supplementary material for: Ndc1 drives nuclear pore complex assembly independent of membrane biogenesis to promote nuclear formation and growth
Source: eLife. 2022 Jul 19;11:e75513. doi: 10.7554/eLife.75513 (PMC9296133; doi:10.7554/eLife.75513)
Supplement: Figure 3—source data 1. [file elife-75513-fig3-data1.xlsx]

## Sheet: Source Data Fig S3C
"NPC" hole diameter measurements (nm)
	control		ndc1 KO
	59.09		37
	46		31.7
	56.8		40.89
	35.4		20.1
	44.8		50.2
	47.3		35.7
	53		29.9
	35.8		31.2
	38.4		51.6
	42		39.8
	46.2		56
	29.1
	35.5
	66.7
	40.6
	42.3
	40.2
	34.7
	47.5
