# Supplementary material for: Ndc1 drives nuclear pore complex assembly independent of membrane biogenesis to promote nuclear formation and growth
Source: eLife. 2022 Jul 19;11:e75513. doi: 10.7554/eLife.75513 (PMC9296133; doi:10.7554/eLife.75513)
Supplement: Figure 4—figure supplement 1—source data 1. [file elife-75513-fig4-figsupp1-data1.xlsx]

## Sheet: Source Data Fig SC
pronuclear volume
time (s) relative to expansion start	control
0	8.87946	7.6848	7.29953	7.29953	9.70727	9.15266	7.94528	7.81468	4.25377	10.8486	5.47564	8.74389	6.54911	6.54911	7.29953	4.14787	5.36037	8.74389	8.60903	8.74389	5.47564	5.94483	5.01949	6.67229	5.36037	8.60903	7.04638	5.24591	4.46822	7.6848	3.93876	6.4267	7.04638	8.20865	3.73329	7.81468	6.06412	6.1842	6.92093	5.47564	5.47564	4.79642	3.93876	8.87946	8.74389	6.54911	7.55564	7.6848
10	9.29029	9.29029	12.638	12.638	11.5831	11.2874	11.435	10.8486	7.81468	11.732	6.79623	21.9193	7.81468	9.70727	9.70727	5.94483	6.54911	11.5831	10.7036	12.638	8.20865	9.15266	11.2874	10.2727	6.54911	12.638	13.7232	7.6848	6.06412	9.29029	5.47564	6.79623	7.94528	8.07661	3.93876	9.70727	7.55564	7.55564	7.42722	5.70863	6.79623	6.4267	5.13228	9.5676	6.06412	6.1842	9.70727	9.01571
20	10.2727	9.84762	14.6767	14.6767	16.3126	17.6622	9.70727	12.1822	7.6848	13.4101	7.04638	11.8814	9.01571	12.638	8.74389	7.04638	9.70727	15.1614	12.4855	16.1464	8.87946	14.6767	11.5831	12.638	8.74389	10.8486	12.1822	8.74389	6.67229	9.70727	7.17258	6.79623	9.42861	9.42861	4.25377	10.2727	8.07661	7.94528	13.4101	7.17258	7.42722	7.42722	12.3335	9.5676	7.6848	5.01949	9.70727	10.1303
30	10.4157	9.01571	12.638	12.638	17.3215	23.593	9.70727	14.8377	10.8486	16.1464	8.20865	12.638	10.1303	11.435	9.70727	8.3414	9.70727	13.0994	12.4855	19.2226	16.3126	16.1464	14.6767	24.35	7.29953	16.1464	12.4855	10.1303	9.15266	11.1405	9.15266	7.17258	9.5676	9.84762	4.57676	10.9942	13.2545	9.84762	12.0315	7.04638	8.60903	7.6848	13.5663	10.8486	12.638	9.01571	12.3335	9.42861
40	9.84762	10.9942	17.8334	17.8334	19.7525	21.553	12.945	19.2226	11.1405	18.3503	9.84762	13.8806	12.1822	11.2874	10.8486	10.5593	16.9829	14.3565	12.1822	24.35	16.4793	17.8334	17.8334	16.1464	10.8486	27.2586	16.9829	9.15266	10.7036	13.4101	9.29029	10.2727	10.5593	10.7036	5.13228	12.3335	14.0386	11.732	12.4855	8.87946	7.81468	7.42722	20.2871	11.5831	10.5593	8.3414	13.4101	6.92093
50	14.6767	12.4855	19.5753	19.5753	21.0073	28.0525	11.435	16.3126	14.9992	23.0306	10.2727	15.3241	14.3565	11.8814	16.9829	11.8814	19.5753	12.1822	15.4874	31.5101	14.1973	17.8334	19.5753	16.9829	12.638	29.0555	17.6622	11.2874	12.945	16.9829	9.29029	11.435	12.0315	11.732	8.74389	16.4793	19.2226	12.7912	14.8377	10.8486	8.47486	9.84762	24.5405	12.3335	11.732	10.8486	13.4101	11.732
60	16.4793	15.4874	27.4563	27.4563	23.7815	29.6629	14.9992	12.638	15.4874	21.9193	13.8806	11.8814	15.3241	14.6767	12.638	15.6513	19.5753	11.8814	11.5831	33.6057	21.1887	27.4563	26.082	19.5753	16.1464	29.0555	19.0471	12.945	14.1973	15.9808	16.8145	10.7036	10.7036	12.3335	7.81468	12.1822	23.0306	18.0052	19.3987	14.3565	9.70727	10.8486	27.4563	14.3565	16.4793	13.2545	15.4874	15.8158
70	17.3215	14.9992	29.0555	29.0555	28.0525	30.8902	15.3241	12.638	20.2871	25.6937	19.2226	12.638	21.0073	17.8334	14.6767	19.0471	21.3706	12.7912	16.9829	33.6057	26.2769	29.0555	20.6462	21.553	17.8334	24.35	20.6462	14.0386	18.0052	15.1614	16.9829	12.7912	10.2727	15.3241	9.01571	21.1887	21.3706	18.5237	23.593	13.2545	9.42861	10.1303	31.5101	14.5163	18.5237	11.5831	15.6513	15.1614
80	20.1084	17.8334	24.35	24.35	26.082	37.0508	25.5003	13.2545	21.7359	27.0613	18.8721	27.2586	24.35	19.5753	16.1464	21.3706	24.35	12.1822	21.3706	37.4893	28.6529	21.553	19.3987	19.5753	17.8334	26.6681	25.1149	13.0994	18.6976	14.0386	21.0073	12.4855	15.3241	17.1519	12.3335	25.1149	22.2877	19.2226	26.4723	14.8377	12.945	9.29029	36.6141	14.6767	20.2871	15.9808	17.4916	19.2226
90	19.3987	17.3215	41.512	41.512	29.6629	37.0508	26.4723	14.3565	33.3941	35.0991	22.1032	24.35	28.0525	19.5753	14.6767	24.9229	30.8902	14.5163	25.1149	45.9038	35.5298	27.4563	19.0471	30.8902	19.5753	42.4243	29.6629	15.4874	22.1032	21.553	21.7359	14.3565	14.1973	19.9302	14.6767	27.2586	28.2521	23.2176	28.2521	15.4874	14.8377	10.8486	41.0583	15.8158	24.16	18.8721	18.8721	21.0073
100	24.35	21.3706	47.5586	47.5586	33.183	40.6063	26.6681	16.3126	34.8845	35.0991	23.2176	29.0555	28.6529	19.2226	14.0386	21.3706	33.6057	15.6513	27.8533	33.6057	33.3941	30.8902	26.6681	29.0555	21.553	41.0583	30.0702	17.3215	26.6681	24.7315	25.3073	18.8721	17.4916	21.1887	18.6976	32.9723	33.8177	26.082	32.3429	18.8721	16.6466	9.42861	41.512	16.8145	27.4563	22.8441	21.3706	30.4793
110	27.6546	25.1149	33.6057	33.6057	32.134	41.9673	30.4793	17.4916	38.1502	35.3142	25.3073	37.4893	32.3429	23.0306	14.5163	26.4723	37.4893	18.1774	29.46	41.512	43.3432	35.0991	36.6141	22.8441	27.2586	35.5298	36.3964	21.1887	31.303	24.7315	25.5003	19.0471	18.1774	22.4727	22.6581	34.8845	39.0374	24.9229	37.7092	21.3706	19.5753	12.4855	47.5586	18.5237	34.6702	27.6546	25.6937	28.2521
120	30.8902	26.082	45.9038	45.9038	33.6057	43.8051	33.6057	19.9302	41.0583	46.6106	28.0525	29.6629	36.6141	25.6937	14.8377	33.6057	36.1791	19.0471	35.0991	45.9038	47.321	35.9622	32.7621	27.2586	21.553	36.6141	40.6063	27.2586	34.6702	30.6845	30.8902	23.0306	20.2871	25.3073	23.4051	39.0374	49.7147	24.16	36.3964	23.9705	18.5237	16.1464	50.6832	18.0052	37.9295	26.4723	26.082	34.4564
130	31.303	36.3964	29.8663	29.8663	46.3746	47.321	41.512	22.2877	43.8051	43.574	30.2745	32.5523	37.2698	29.6629	18.5237	32.9723	42.6534	39.4835	38.815	47.5586	48.9925	43.574	34.0302	28.8539	21.553	44.7338	40.6063	33.3941	38.1502	32.9723	34.2431	24.16	23.4051	26.4723	30.6845	44.7338	59.1618	25.6937	39.2603	28.4523	22.6581	17.4916	57.634	23.7815	46.6106	30.2745	27.4563	37.2698
140	38.815	27.2586	32.5523	32.5523	49.2328	48.035	41.7394	24.35	49.7147	52.6387	38.1502	31.9256	38.3714	35.3142	19.9302	32.3429	38.1502	34.0302	35.0991	51.4136	51.1697	46.847	41.2849	33.183	24.5405	47.5586	50.1982	39.2603	38.3714	32.3429	38.815	25.3073	26.4723	29.8663	31.5101	43.8051	64.0869	31.7176	41.2849	34.2431	26.8645	15.9808	59.4177	25.6937	43.8051	29.8663	29.8663	45.9038
150	36.6141	36.6141	37.9295	37.9295	54.3698	53.8733	44.7338	24.9229	48.035	55.8685	40.1559	44.967	41.7394	34.0302	19.9302	37.7092	48.7525	38.1502	41.9673	59.674	53.8733	50.4405	48.035	40.6063	29.2575	50.9263	48.9925	38.1502	43.574	37.2698	41.7394	26.082	31.7176	31.7176	37.4893	46.847	76.8197	37.4893	43.1129	31.303	28.6529	23.0306	61.2195	26.6681	51.4136	37.0508	38.815	49.4736
160	43.8051	40.1559	44.0367	44.0367	54.8679	56.3711	44.0367	27.4563	52.3929	64.6129	47.7966	51.9025	44.0367	46.6106	25.6937	48.9925	56.1196	41.7394	39.2603	64.0869	54.3698	53.1314	49.9563	40.6063	32.3429	52.6387	48.7525	41.7394	49.7147	40.1559	42.8829	20.8265	33.6057	35.7458	40.1559	50.6832	75.4289	39.2603	52.8848	35.7458	28.4523	24.5405	62.5174	34.8845	53.6256	34.2431	40.8321	55.6178
170	45.2006	41.7394	41.2849	41.2849	57.1277	62.7781	54.1214	30.2745	58.3963	67.7989	45.669	56.8751	51.4136	50.1982	29.0555	44.501	56.6229	49.4736	41.2849	64.0869	63.8244	56.3711	60.1877	51.1697	36.3964	52.6387	51.6578	49.2328	54.1214	33.6057	47.5586	20.2871	36.1791	37.2698	38.593	54.8679	82.7526	41.9673	56.3711	39.4835	30.4793	25.5003	67.7989	41.512	57.3807	35.3142	47.0838	59.9307
180	39.9314	41.2849	47.5586	47.5586	59.674	64.0869	52.6387	32.5523	64.8764	72.9469	50.6832	63.3005	51.1697	55.3674	32.9723	39.7072	54.3698	45.669	37.7092	78.781	64.0869	64.0869	62.7781	53.3783	39.4835	59.674	53.8733	48.7525	61.4784	45.9038	49.9563	21.553	40.6063	41.0583	43.574	56.8751	97.1556	44.967	69.1414	41.0583	35.0991	31.303	75.4289	45.9038	62.2571	43.8051	54.6187	62.7781
190	47.321	53.6256	57.634	57.634	67.7989	72.1257	54.8679	35.9622	74.0466	84.7628	50.1982	72.1257	50.1982	53.1314	38.1502	47.7966	56.6229	54.6187	43.574	72.6728	66.9976	72.6728	70.2218	57.3807	45.9038	65.1403	57.3807	50.4405	63.3005	45.9038	54.3698	12.638	44.7338	42.8829	42.6534	64.6129	100.188	48.2738	73.496	43.8051	35.9622	32.7621	83.8993	54.1214	65.1403	52.1475	57.1277	65.1403
200	50.9263	47.321	73.7711	73.7711	69.9512	70.764	56.3711	34.0302	68.3349	78.781	55.8685	77.6582	57.8877	64.3497	39.7072	51.1697	57.3807	56.8751	50.6832	79.0625	70.4927	69.411	77.6582	54.3698	50.6832	69.1414	56.8751	57.3807	65.4046	56.8751	56.6229	12.945	46.3746	48.035	41.512	71.0357	107.593	51.4136	77.0988	53.3783	39.9314	34.6702	85.3401	54.8679	69.9512	48.9925	61.9972	72.6728
210	48.2738	53.6256	72.6728	72.6728	81.6112	84.7628	57.1277	40.1559	77.9384	86.2084	59.9307	82.1813	61.7376	66.9976	40.6063	63.8244	63.5623	68.8722	54.8679	73.2213	77.3783	79.9091	76.2623	61.2195	45.669	66.4652	66.9976	57.8877	62.5174	60.4451	61.9972	15.4874	47.7966	50.1982	48.035	75.1517	115.81	53.3783	84.1868	54.3698	44.0367	38.3714	90.5938	54.8679	81.3267	53.8733	67.2644	81.8961
220	54.3698	53.8733	85.9186	85.9186	75.1517	77.9384	61.2195	40.1559	85.3401	89.711	68.0667	92.9622	61.9972	70.2218	46.3746	63.5623	66.4652	64.8764	53.8733	79.0625	73.496	82.4668	77.0988	60.1877	52.6387	78.781	67.2644	61.9972	78.781	59.674	68.8722	19.2226	53.8733	52.8848	47.321	67.5315	123.573	56.8751	88.5383	60.1877	41.9673	40.6063	98.0622	58.1418	80.4751	55.8685	67.7989	84.1868
230	57.1277	65.9342	89.711	89.711	75.1517	84.4746	72.1257	42.8829	90.5938	95.3509	73.2213	91.4796	63.3005	76.8197	51.1697	70.2218	65.4046	70.764	56.1196	69.9512	75.9842	95.3509	91.4796	65.4046	50.9263	73.496	80.7587	65.1403	78.2189	59.4177	68.8722	32.7621	56.1196	55.6178	46.139	74.3223	129.171	59.9307	89.4173	64.0869	46.139	47.0838	98.365	64.8764	86.2084	56.1196	78.4998	90.2992
240	60.7029	63.8244	93.2597	93.2597	80.4751	90.0049	77.3783	46.6106	91.7755	99.5794	75.1517	97.4575	70.4927	83.8993	52.6387	82.1813	72.3991	65.6692	59.1618	65.4046	80.4751	99.2754	97.4575	59.9307	60.1877	65.1403	74.3223	68.8722	83.0388	69.411	71.58	30.2745	60.7029	60.1877	48.2738	81.0425	136.877	60.7029	91.184	67.5315	51.6578	47.5586	96.8541	66.9976	86.4985	60.4451	80.7587	95.9512
250	61.7376	67.2644	104.177	104.177	90.8888	100.799	81.8961	48.9925	98.365	101.104	84.7628	101.41	67.2644	87.9539	52.8848	81.3267	75.4289	70.764	65.4046	79.6265	82.7526	109.785	92.6651	76.5408	70.2218	72.9469	84.1868	71.0357	96.2519	69.1414	74.8749	30.0702	65.6692	60.1877	51.4136	85.6292	146.456	65.4046	95.3509	74.8749	53.6256	51.4136	102.637	65.9342	87.9539	61.2195	85.6292	99.5794
260	63.3005	71.3077	104.177	104.177	91.4796	109.785	77.3783	52.8848	102.944	99.8838	92.9622	116.771	76.5408	92.3682	58.9063	84.7628	78.4998	80.7587	73.7711	85.6292	88.2459	106.347	98.9716	81.3267	67.7989	68.3349	85.9186	69.9512	91.184	74.8749	77.3783	42.4243	69.6809	66.4652	48.9925	95.0512	156.249	71.0357	96.8541	73.7711	60.961	62.2571	111.045	71.0357	95.0512	66.9976	90.8888	100.188
270	67.7989	64.0869	112.309	112.309	99.2754	110.729	86.4985	51.4136	102.637	104.796	99.8838	112.626	81.8961	89.711	60.1877	98.365	81.0425	79.9091	77.3783	93.5575	87.3708	120.966	103.56	81.3267	65.9342	79.3443	92.6651	70.764	100.493	71.3077	80.4751	47.7966	74.0466	71.0357	51.6578	95.6509	165.53	74.0466	100.188	80.4751	62.5174	63.5623	112.309	71.8527	103.869	71.58	98.0622	101.716
280	63.3005	68.8722	127.186	127.186	99.2754	121.942	96.2519	59.1618	103.869	113.896	109.785	122.593	85.6292	97.1556	68.0667	100.493	95.3509	87.6622	88.831	92.9622	88.831	124.555	101.104	83.3253	75.4289	86.4985	90.8888	77.3783	105.415	87.9539	81.8961	44.967	79.6265	75.4289	55.8685	106.036	169.51	75.7063	104.796	89.124	67.2644	69.6809	112.943	81.0425	106.969	77.9384	102.023	106.969
290	73.7711	83.3253	132.838	132.838	99.8838	124.227	106.036	62.5174	110.414	116.13	110.1	128.84	88.2459	99.8838	64.3497	97.4575	90.5938	86.2084	88.2459	90.2992	99.5794	140.956	105.105	93.2597	78.4998	93.8556	99.5794	77.9384	107.281	85.3401	82.4668	52.6387	81.8961	76.2623	53.8733	109.157	176.458	80.1919	105.415	92.9622	75.1517	69.9512	114.214	86.4985	113.896	81.0425	108.218	118.379
300	79.0625	98.365	139.592	139.592	103.869	127.847	100.188	62.2571	127.847	118.701	120.642	140.614	90.2992	105.105	73.2213	110.729	97.1556	89.124	91.184	92.3682	98.9716	137.554	93.5575	92.6651	94.1541	101.41	105.415	84.1868	108.844	91.184	88.2459	53.8733	86.4985	80.7587	59.1618	109.785	184.245	82.4668	113.26	98.9716	76.5408	76.2623	110.414	86.4985	113.578	88.2459	117.735	118.057
310	82.1813	105.415	142.667	142.667	112.626	119.67	96.5528	63.5623	130.834	123.573	127.516	145.075	83.0388	116.13	83.8993	113.26	92.9622	92.0717	100.493	102.33	101.41	144.73	102.023	90.2992	97.4575	109.157	111.993	90.0049	110.1	100.188	92.3682	69.6809	85.6292	82.1813	63.8244	114.852	192.901	78.781	114.852	97.1556	84.1868	74.0466	111.045	85.6292	112.626	84.7628	111.993	128.508
320	82.7526	108.844	142.667	142.667	104.796	131.501	97.7597	64.0869	140.273	130.834	124.555	159.797	87.0797	120.318	83.0388	117.414	89.124	91.184	104.177	106.036	112.626	152.377	114.214	101.41	98.6682	112.626	112.626	98.365	111.36	94.1541	98.0622	71.3077	91.7755	89.4173	65.1403	119.67	200.151	88.5383	119.994	106.969	93.8556	77.0988	116.451	93.2597	117.735	102.33	125.211	134.18
330	84.4746	111.676	155.19	155.19	121.616	135.863	103.252	69.6809	150.278	136.539	122.593	165.53	85.9186	130.168	74.0466	119.994	106.036	105.105	110.414	109.157	106.347	143.697	118.701	101.716	103.252	109.471	113.896	98.0622	122.593	93.5575	96.2519	80.1919	94.7519	91.184	65.9342	123.246	202.459	86.7889	121.942	111.36	98.9716	81.0425	115.49	97.4575	124.227	109.157	131.167	142.324
340	86.4985	128.177	152.377	152.377	115.49	158.02	101.716	76.5408	149.233	149.233	136.877	174.254	77.3783	125.211	84.7628	119.67	111.993	103.252	108.218	107.593	121.291	143.01	121.942	100.493	108.844	118.057	126.856	98.9716	119.024	108.844	98.6682	79.9091	98.9716	95.0512	67.2644	131.501	201.304	89.4173	135.189	119.67	108.218	85.0513	129.171	98.6682	125.868	106.969	132.503	142.667
350	92.6651	125.211	161.939	161.939	118.379	162.297	106.347	73.7711	155.896	141.982	140.614	180.152	95.3509	134.18	85.9186	117.414	116.771	106.036	117.092	115.81	113.896	146.802	127.186	103.252	123.573	117.092	130.834	103.56	129.503	98.9716	100.799	85.0513	105.415	101.41	69.9512	134.516	209.435	90.8888	139.251	112.626	117.414	79.3443	141.298	96.8541	130.501	112.309	139.251	153.43
360	102.944	123.246	162.297	162.297	114.533	160.154	111.36	76.8197	157.665	153.078	143.01	180.152	101.716	138.572	93.2597	130.168	119.994	103.252	123.573	114.852	121.942	150.977	128.508	110.414	127.847	119.67	132.169	110.1	133.173	94.4528	107.281	93.8556	112.626	103.56	66.7312	144.385	219.255	90.2992	140.273	120.642	119.347	81.8961	146.11	83.6122	135.189	120.642	150.278	152.377
370	109.157	118.701	168.421	168.421	118.057	166.612	113.896	86.4985	173.521	148.537	144.73	191.386	107.281	149.581	88.5383	130.168	111.36	118.379	129.503	127.847	119.994	157.311	138.911	120.318	126.197	123.573	141.982	107.281	132.169	107.593	107.905	93.2597	113.26	105.415	74.0466	145.765	222.428	93.5575	144.385	129.171	121.616	87.0797	141.982	95.3509	138.911	125.868	153.078	155.896
380	106.969	119.024	179.781	179.781	126.856	155.543	124.882	84.1868	159.797	158.02	141.64	198.234	117.735	147.495	94.1541	125.211	113.578	117.092	120.966	128.177	123.246	160.867	145.765	120.642	132.169	127.516	130.501	103.869	133.173	106.036	112.309	91.7755	120.318	109.471	77.6582	150.977	230.429	88.5383	160.154	133.844	127.847	88.2459	150.627	103.252	143.697	133.508	158.02	162.655
390	115.49	105.105	176.09	176.09	121.291	170.237	135.863	95.0512	176.826	173.521	138.232	212.17	124.882	154.837	106.658	140.614	121.616	121.616	130.834	131.167	128.177	156.603	144.73	120.318	132.169	129.503	145.42	120.642	147.495	114.214	111.045	98.0622	127.186	109.157	78.781	139.251	237.303	93.8556	158.73	138.232	133.844	94.4528	157.311	106.969	148.537	129.503	164.45	166.973
400	115.81	107.593	195.562	195.562	127.516	183.498	142.667	94.7519	165.53	159.797	144.73	211.387	115.171	158.73	119.994	152.377	133.173	122.919	123.9	145.765	134.516	170.965	165.17	127.847	136.201	129.836	148.189	118.057	145.42	121.616	112.943	106.969	130.834	111.676	78.781	147.842	239.745	86.2084	165.17	145.075	132.838	95.0512	154.837	90.5938	147.842	127.516	172.059	176.09
410	114.533	120.966	156.249	156.249	129.836	184.245	139.592	93.2597	154.837	162.655	150.278	226.017	129.171	172.789	130.501	163.372	122.919	132.169	126.856	137.215	129.171	170.6	160.154	127.847	138.911	131.501	154.485	126.856	149.233	114.533	114.533	107.593	135.863	106.036	79.0625	170.237	246.299	83.0388	163.372	146.802	124.227	97.4575	158.375	93.8556	163.731	139.932	163.372	184.245
420	116.771	119.347	157.665	157.665	155.19	204.776	157.665	105.415	172.059	172.424	136.201	221.236	126.197	177.932	131.501	163.372	141.298	136.201	124.555	146.456	137.215	180.152	168.784	133.173	146.802	137.893	162.297	125.868	158.375	147.149	120.318	120.318	132.838	106.036	85.6292	170.6	252.91	88.5383	177.932	149.233	121.616	105.725	162.297	112.309	162.655	140.273	158.375	189.121
430	125.539	120.318	173.155	173.155	136.201	199.767	150.278	116.13	176.826	174.62	145.765	230.429	116.13	187.616	126.526	174.254	132.838	136.877	132.169	145.075	140.614	179.041	165.89	136.201	162.655	131.167	172.424	122.593	152.727	134.853	115.81	128.508	140.614	98.0622	85.0513	169.873	252.495	99.8838	167.697	152.377	127.186	108.844	161.224	117.735	159.441	143.01	168.784	185.741
440	134.516		185.366	185.366	135.189	186.865	177.563	112.943	169.873		155.896	231.637	124.882	199.767	137.554	172.424	137.215	139.932	137.554	155.896	145.765	192.143	166.973	134.853	165.53	132.169	164.09	127.847	171.329	130.834	121.942	131.501	149.581	100.799	87.3708	181.265	262.096	88.831	171.329	152.026	128.177	95.6509	169.873	119.994	169.873	135.189	163.731	183.871
450	139.592		203.616	203.616	131.835	212.953	152.727	111.676	176.458		159.086	235.68	125.211	205.163	129.836	186.115	141.982	144.385	131.167	149.581	152.727	195.943	166.973	133.844	163.014	132.838	169.147	144.385	155.19	152.026	118.057	131.167	148.885	97.7597	95.3509	180.523	263.778	97.7597	176.458	141.64	137.893	106.347	176.458	121.616	163.014	150.977	174.987	188.744
460	145.765		204.002	204.002	138.232		164.45	107.281	178.671			233.655	140.273	199.767	137.215	190.252	148.537	153.078	138.911	154.133	154.837	204.776	163.372	139.932	171.329	130.834	176.458	138.572	174.987	136.539	109.471	145.42	156.249	107.905	99.2754	178.671	274.798	97.7597	180.523	143.01	128.177	99.8838	166.612	128.508	174.62	148.885	173.887	188.744
470	139.592		204.389	204.389	143.697		163.372	129.171	188.368			235.274	134.853	174.254	148.537	186.49	153.43	147.149	133.173	166.251	152.727	214.523	165.17	139.592	171.329	141.298	180.152	134.853	166.251	136.539	117.735	148.885	159.797	95.9512	98.9716	190.63	281.653	111.676	170.965	144.041	144.73	118.379	174.62	127.516	179.781	148.189	180.523	197.087
480	164.81		198.234	198.234			159.797	120.318				247.534	119.994	159.086	148.885	181.637	164.81	158.02	152.026	160.154	157.665	218.464	180.894	133.508	179.781	142.667	181.637	135.863	166.251	156.249	117.414	143.354	161.939	114.533	101.104	200.919	295.532	112.943	193.28	160.51	134.853	116.451	172.424	136.877	176.458	153.781	184.618	207.101
490	164.81		237.71	237.71			176.826					252.081	155.19	185.366	156.957	194.42	161.939	148.537	145.075	168.059	159.086	223.622	175.354	129.836	180.894	138.911	191.386	140.956	184.245		117.414	154.485	157.311	120.318	105.725	198.617	278.218	113.896	172.059	153.078	138.572	119.347		146.456	165.53	144.385	187.616	198.617
500	167.335		229.625	229.625			162.297					257.907		191.008	153.43	196.324	169.51	159.797	147.495	172.059	164.09	210.996	183.498	130.834	186.865	138.911	199	149.929	185.366		119.347	153.43	159.441	122.919	104.796	201.304	294.658	117.414	184.992	148.537	152.727	121.616		148.189	170.965	157.665	189.875	198.234
510	166.251											263.778		207.489	168.059	187.992	162.655	155.19	161.224	175.722	168.421	224.819	165.53	141.982	189.498	139.592	206.325	144.385	188.368		112.943	163.731	164.45	116.771	97.1556	213.345	285.966	124.227	172.789	171.694	152.377	119.67		155.543	185.741	153.078	193.66
520	180.894											279.076		223.224	176.09	182.753	163.014	153.078	148.189	169.873	165.89	217.279	192.522	131.835	194.42	142.324	183.498	152.026	186.115		107.905	172.059	158.375	124.882	99.2754	200.535	286.832	126.197	165.17		155.543	115.49		153.43	186.865	140.614	194.42
530	176.458											278.218		195.562	184.245	197.852	198.617	151.676	151.676	170.237	167.335	229.223	165.17	130.501	203.616	144.041	188.744	152.026	185.741		114.214	172.789	164.45	129.836	101.104	212.561	306.528	122.593	146.456		154.837	127.186		158.73	189.875	157.665	198.234
540	179.041											282.514			189.121	204.776	189.121	148.189	155.896	171.329	165.17	250.424	169.873	136.877	205.937	154.485	209.435	145.42	180.894		112.309	173.887	165.17	132.169	102.33	203.23	311.854	130.834	174.254		147.149	130.168		162.655	189.498	165.53	193.28
550	169.873											291.171			203.616	202.459	187.24	155.896	155.543	176.826	160.867	226.417	187.24	148.885	216.884	148.537	210.606	152.377	183.125		124.882	183.871	175.354	129.171	104.796	201.688	306.528	136.201	158.375		156.249	129.171		156.957	192.143	156.603	199
560	179.041											289.867			187.992	224.42	182.008	162.297	168.059	164.45	160.154	252.91	204.002	161.939	229.223	156.603	240.153	177.932	210.606		125.211	179.781	179.411	136.877	105.725	184.618	305.202		165.89		163.372	140.956		164.81		177.932	193.66
570	166.973														174.62	182.008	168.059	159.086	168.784	175.722	163.731	252.495	192.143		223.622	178.671		183.125			123.246	186.115	180.523	130.501		192.143	340.769		131.501		184.618			171.329		166.251	213.737
580	164.81														192.143	191.008	166.251	164.09	180.152	188.368	169.147	233.655	221.236		225.218	174.987		178.671			122.267	184.618	179.041	136.877		183.125					157.665			177.932		176.826	212.17
590	170.237														177.563	169.51	167.335	165.17	164.81	187.616	164.09	251.252	204.389			184.618		184.618			140.273	193.66	180.523	142.324							178.671			187.616		187.992	225.218
600	169.51														198.234	193.66	177.194	183.498	168.059	184.245	173.887					172.789		197.852			139.932	200.151	182.008	131.167										177.932		176.458
610	178.671														202.844	216.49	153.43	182.008	183.871		174.62					195.943		199				194.8	172.789	119.67										196.706		185.741
620	191.386														204.389	217.674	170.965	186.115	181.265		184.618							195.562				220.443	169.873	119.024										179.411		205.55
630	191.764														203.616	223.224	179.041	198.617			174.62											192.143	173.887	117.735										172.059
640	193.28															235.68	178.302	197.469			180.523											194.42	173.887	112.943										184.245
650																	176.09	205.937			180.894											249.597	167.697	128.177										145.765
660																	184.245	212.953			178.671											207.489	163.731											182.38
670																	179.781	208.656			181.637												148.537											149.929
680																	183.871	207.489			178.302												138.911											170.237
690																		210.996			186.115												129.836											202.844
700																					183.125												137.215

## Sheet: Source Data Fig S5E
pronuclear volume
time (s) relative to expansion start	ndc1 RNAi + cnep-1 deletion										ndc1 RNAi
0	6.37063	6.37063	5.46202	6.37063	4.64419	6.37063	5.46202	6.54911			6.37063	5.82633	4.64419	6.37063	6.37063	6.37063	6.37063	7.3748	5.46202	6.1842
10	7.3748	7.3748	6.37063	7.3748	5.46202	7.3748	6.37063	7.55564			7.3748	6.4267	5.46202	8.47486	8.4793	7.94528	7.3748	8.4793	6.37063	6.92093
20	8.4793	8.4793	8.4793	8.4793	6.37063	8.4793	7.3748	9.01571			8.4793	6.30506	6.37063	9.70727	11.0084	8.74389	9.68893	11.0084	7.3748	8.3414
30	8.20865	9.68893	8.4793	6.37063	7.3748	9.68893	9.98863	10.4157			11.2874	6.79623	8.4793	11.2874	12.4426	9.15266	11.0084	12.4426	7.3748	9.5676
40	9.29029	12.4426	13.9963	11.1405	8.4793	9.68893	10.9942	13.5663			11.1405	6.67229	8.3414	12.7912	13.9963	9.70727	12.4426	13.9963	8.4793	9.98863
50	9.98863	13.9963	11.0084	12.945	9.29029	11.0084	11.732	14.6767			11.5831	7.29953	9.15266	13.5663	15.9808	9.84762	13.9963	17.481	11.0084	10.7036
60	10.5593	15.6741	15.6741	14.5163	10.5593	12.4426	14.6767	18.1774			15.3241	7.81468	10.1303	13.0994	19.0471	10.2727	15.6741	19.4217	12.4426	11.435
70	14.9992	17.481	16.8145	14.6767	13.2545	13.9963	19.0471	21.9193			14.6767	9.15266	10.2727	14.6767	15.9808	10.5593	21.5009	21.5009	16.3126	12.4855
80	16.6466	22.6581	19.7525	16.1464	12.3335	15.6741	21.7359	24.16			16.3126	12.0315	10.7036	16.1464	21.7359	14.3565	25.8876	23.7234	18.5237	12.638
90	20.8265	22.8441	22.4727	17.8334	15.9808	20.1084	28.4523	25.5003			19.7525	12.7912	13.0994	17.8334	21.0073	13.8806	28.0525	26.0941	23.0306	13.2545
100	21.1887	25.6937	22.1032	27.2586	17.1519	22.4727	30.2745	29.0555			20.2871	13.8806	13.4101	19.7525	22.2877	16.1464	33.6057	28.6529	24.7315	14.0386
110	22.8441	26.4723	25.3073	28.4523	18.6976	26.082	30.2745	32.7621			23.2176	14.8377	13.5663	20.6462	23.593	16.9829	32.3429	32.5523	27.2586	15.8158
120	26.4723	31.303	30.2745	31.303	21.0073	27.0613	31.303	32.5523			23.2176	17.4916	17.1519	23.0306	25.1149	18.0052	34.0302	32.7621	28.8539	14.6767
130	28.6529	36.1791	33.183	33.6057	20.6462	29.2575	31.9256	35.7458			25.6937	19.0471	16.9829	24.7315	28.2521	20.4664	37.9295	35.0991	31.9256	16.4793
140	33.183	37.7092	37.2698	32.9723	23.9705	32.9723	33.3941	36.3964			25.3073	22.1032	19.9302	23.4051	26.6681	23.7815	35.3142	34.8845	33.6057	18.0052
150	34.4564	42.4243	40.6063	37.4893	26.8645	35.0991	36.6141	37.0508			27.2586	23.593	21.9193	24.16	26.082	21.1887	37.4893	35.9622	32.9723	19.3987
160	41.9673	50.9263	43.1129	37.0508	28.8539	39.2603	39.7072	44.0367			29.2575	24.5405	22.6581	27.0613	26.2769	22.1032	39.2603	41.9673	35.3142	19.3987
170	45.4346	54.8679	48.5129	43.3432	28.8539	43.8051	43.3432	45.4346			30.0702	23.9705	22.6581	26.4723	29.8663	23.593	41.512	42.6534	32.9723	20.2871
180	47.321	56.6229	52.8848	42.6534	33.3941	41.512	49.7147	49.7147			31.303	29.6629	22.2877	30.0702	28.8539	26.8645	49.4736	45.2006	35.5298	21.1887
190	52.3929	59.1618	55.6178	45.9038	30.2745	46.3746	49.9563	54.3698			31.5101	27.6546	24.16	30.6845	32.134	27.0613	45.4346	49.7147	41.2849	21.7359
200	65.1403	60.961	62.5174	49.9563	30.8902	48.7525	52.8848	60.1877			32.3429	32.5523	25.5003	31.7176	35.9622	31.5101	49.7147	48.9925	39.7072	23.7815
210	62.5174	70.2218	65.4046	54.1214	33.6057	54.8679	56.1196	64.0869			33.3941	33.183	31.303	33.6057	39.7072	29.0555	48.7525	56.1196	44.2687	24.5405
220	63.8244	70.764	68.6034	58.6511	37.7092	56.3711	59.9307	62.7781			35.5298	36.8322	32.7621	34.8845	35.0991	30.4793	52.8848	60.1877	43.8051	29.46
230	63.0391	73.7711	72.3991	62.7781	39.7072	57.634	67.2644	64.6129			36.1791	35.3142	30.6845	30.0702	36.6141	32.3429	55.1175	60.7029	48.035	28.6529
240	66.4652	80.7587	78.2189	63.5623	44.0367	61.7376	64.3497	67.5315			37.7092	34.0302	30.4793	31.7176	42.4243	32.5523	58.6511	60.961	45.4346	34.6702
250	68.8722	92.9622	77.0988	68.0667	43.574	64.8764	75.7063	71.8527			38.593	37.4893	34.0302	35.9622	37.9295	32.7621	63.3005	64.8764	50.6832	34.0302
260	73.2213	92.0717	82.7526	69.6809	46.6106	66.1995	76.5408	74.0466			41.9673	38.815	36.6141	39.9314	41.512	33.8177	63.3005	69.9512	49.4736	35.7458
270	74.8749	93.2597	85.0513	71.0357	49.7147	72.9469	83.8993	79.6265			39.9314	42.6534	36.3964	45.669	39.4835	31.7176	69.6809	63.8244	53.1314	36.1791
280	79.9091	98.0622	96.2519	79.6265	53.1314	75.1517	86.4985	90.0049			40.1559	42.8829	37.7092	46.847	43.8051	33.6057	68.6034	70.2218	54.3698	35.7458
290	80.7587	99.5794	92.3682	79.6265	58.6511	73.2213	87.6622	99.2754			42.4243	43.3432	42.1956	55.6178	49.4736	33.3941	71.8527	66.4652	61.9972	31.0964
300	84.1868	99.8838	91.4796	78.4998	55.3674	76.8197	94.4528	99.2754			41.9673	44.2687	44.501	48.7525	46.847	34.8845	71.3077	69.1414	63.0391	37.9295
310	88.2459	103.869	100.493	84.4746	60.7029	81.0425	95.0512	109.157			43.574	44.501	45.669	48.9925	45.669	34.6702	78.4998	68.0667	61.9972	39.9314
320	94.7519	105.725	97.1556	82.7526	63.5623	79.0625	106.347	116.771			44.7338	48.5129	45.669	47.321	50.4405	34.2431	72.1257	79.0625	67.5315	32.3429
330	96.2519	108.218	105.105	83.8993	63.8244	85.0513	102.023	122.919				54.6187	46.139	49.4736	54.1214	33.8177	77.3783	65.6692	67.7989	34.6702
340	100.493	116.13	105.725	84.1868	57.634	87.3708	104.177	122.919				53.1314	47.7966	49.2328	55.1175	31.303	82.4668	92.9622	62.2571	30.0702
350	101.104	119.024	114.852	87.3708	61.7376	90.5938	100.493	126.856				55.3674	51.6578	46.847	55.8685	35.3142	71.58	74.5985	63.8244	30.0702
360	99.2754	115.49	115.49	89.124	64.6129	90.2992	107.281	128.508				58.6511	52.8848	42.4243	56.6229	34.0302	74.8749	75.7063	72.9469	32.3429
370	103.252	123.573	118.701	88.2459	63.5623	89.711	112.626	136.877				60.7029	55.8685	43.574	58.3963	33.8177	72.9469	85.0513	70.4927	45.669
380	104.796	123.573	126.856	92.3682	63.5623	92.0717	113.578	144.041				60.4451	56.1196	46.6106	66.9976	34.8845	80.1919	98.365	70.764	40.6063
390	110.414	134.853	136.539	96.8541	61.7376	91.184	110.1	141.982				60.4451	62.7781	44.0367	67.5315	39.7072	91.184		83.0388	48.7525
400	107.593	137.893	137.893	96.2519	64.8764	97.4575	105.415	139.932				67.7989	63.8244	46.3746	68.8722	41.0583	85.6292		75.4289
410	110.414	136.877	146.11	96.2519	65.1403	98.365	105.105	147.842				65.9342	68.6034	49.4736	73.7711	36.1791	76.8197		85.0513
420	106.347	138.572	146.456	103.252	73.7711	102.637	106.347	141.298				63.5623	71.0357	48.9925	72.3991	39.0374	85.6292		75.4289
430	106.969	134.18	159.441	103.252	75.1517	102.637	115.49	139.592				61.7376	66.7312	49.4736	79.0625	43.8051	74.0466
440	112.943	135.863	161.939	102.637	74.5985	106.036	111.993	159.441				68.3349	69.9512	45.669	79.3443	39.0374	88.831
450	113.578	144.385	154.133	104.177	82.1813	107.281	117.735	143.01				66.4652	70.2218	51.1697	87.0797	41.512	82.1813
460	117.092	140.273	159.797	100.493	85.0513	111.676	120.642	149.581				68.6034	71.8527	44.7338	78.4998	41.2849	100.493
470	118.379	144.73	165.17	109.157	95.6509	108.844	125.211	149.233				63.8244	72.6728	46.139	81.3267	44.501	104.177
480	123.9	142.667	181.637	107.281	94.1541	112.626	120.318	156.249				61.4784	74.5985	54.6187	80.7587	44.2687	85.0513
490	119.347	149.581	181.637	110.729	92.0717	115.81	123.573	156.249				68.3349	76.5408	60.1877	90.2992	44.7338
500	127.847	148.885	178.671	103.869	96.2519	118.057	116.771	168.784				70.764	79.3443	59.4177	81.6112	42.1956
510	129.503	148.189	178.671	111.045	105.415	124.227	123.9	168.784				67.5315	79.3443	59.674	87.3708	49.4736
520	129.759	153.781	178.302	108.844	107.905	127.847	127.516	159.797				74.3223	79.3443	71.3077	88.831	48.7525
530	128.177	154.133	170.6	110.729	108.218	126.526	127.516	181.637				61.2195	84.4746	65.4046	99.5794	48.5129
540	131.835	154.837	176.826	119.024	113.578	132.503	131.835	179.411				71.0357	99.8838	62.7781	99.5794	52.1475
550	128.177	160.51	172.059	111.36	115.49	133.508	134.18	179.411				72.6728	83.6122	73.496	101.41	47.5586
560	130.834	158.02	181.637	114.214	108.531	134.516	137.215	181.637				57.1277	88.5383	77.9384	99.5794	47.5586
570	133.844	170.965	173.521	111.36	112.943	141.982	136.877	178.671				75.1517	88.5383	76.2623	98.6682	49.9563
580	126.856	167.335	183.125	113.26	113.896	137.215	139.932	181.265				53.6256	92.0717	81.0425	106.036	48.5129
590	132.838	176.826	187.616	111.676	112.309	136.201	142.667	191.386				85.6292	95.0512	73.7711	105.725	48.7525
600	127.186	169.147	181.637	124.227	116.771	144.385	144.041	199					90.5938	91.184	103.56	60.1877
610	131.835	176.09	183.498	121.291	119.994	150.278	141.298	187.24					103.56	83.8993	97.4575	57.634
620	133.173	169.147	180.152	127.516	119.024	145.075	148.537	179.041					96.8541	88.2459	93.2597	58.3963
630	134.853	174.62		127.847	119.994	149.929	148.537	197.469					110.414		101.41	57.3807
640	134.18	176.826		121.616	124.882	156.957	150.278	194.04					111.676			53.8733
650	141.982	177.563		126.197	108.531	151.676	153.078	202.074					107.281			66.4652
660	140.614	167.697		120.642		151.326	145.42	212.17					110.729			60.4451
670	135.863	160.154		123.246		151.326	151.676	197.469					112.309			61.9972
680	143.697	161.582		128.84		153.078	156.249									58.6511
690	136.539	166.973		129.171		158.73	136.201									65.6692
700				132.838		159.441	130.168									59.4177

## Sheet: Source Data Fig S5G
number of cytoplasmic Nup160 puncta
time (s) relative to PCR	CNEP-1 Deletion																											CNEP-1 Deletion + npp-22 RNAi
-300	15	12	6	59	54	15	7	16	13	59	27						11											3	6	6	5	12	5	2	8	7
-100	9	9	2	51	38	8	8	10	8	41	32	26		18	15		16											5	2	5	3	18	3	4	3	3
100	0	0	0	1	4	0	0	0	0	0	0	1		0	0		0											1	0	0	1	6	1	3	0	0

## Sheet: Source Data Fig S5H
Nuclear to cytoplasmic ratios
Ratio is then multiplied by nuclear area
Time (s) relative to anaphase onset
	chmp-7 deletion										chmp-7 deletion + ndc1 RNAi
0	7.50022	8.54929	6.52778	6.74124	6.9341	7.11879	10.0298	5.02654			6.93076	8.62212	4.89037	7.87752	7.37739	6.58055	3.85665	6.18731
20	5.43335	6.54305	7.25871	6.22388	6.69289	8.61795	10.0623	6.09453			9.5957	10.6331	7.0183	10.146	7.2828	6.78353	4.98576	10.8278
40	5.86242	6.70931	5.27286	7.44504	6.16283	8.45385	10.1971	5.1377			10.4969	8.02824	7.00271	8.2258	7.43712	6.53736	4.90453	9.01522
60	7.43064	8.33371	5.6575	6.47722	7.32269	7.83242	10.6572	4.24072			8.65162	8.88947	9.17663	7.88609	8.75128	6.89904	4.49149	12.6218
80	9.50858	8.53379	6.36701	6.48936	6.0951	8.51983	10.4959	4.79158			8.12269	9.55008	8.90928	9.80668	8.12309	8.39947	5.12441	10.5561
100	9.5157	10.4244	6.76665	9.33788	9.17373	11.1179	11.8392	6.35429			9.01945	9.23756	7.82328	9.05253	8.39519	10.3349	5.15056	10.2575
120	11.3138	13.9242	11.0417	14.9124	12.8716	12.8446	18.1584	7.3278			8.7119	11.0601	8.35552	8.95932	10.9687	11.1616	5.77419	10.6695
140	16.1433	18.0549	14.1241	18.3855	17.7259	19.729	27.175	11.3424			7.78607	13.2347	10.1132	12.2523	13.5656	13.2167	6.96667	15.4757
160	18.5014	24.5504	20.4286	22.7648	28.6073	21.9965	30.2852	18.3146			10.3351	16.7858	10.2903	12.0377	15.826	12.2686	8.29062	17.0259
180	22.479	29.6693	27.4838	27.6305	33.6064	38.1848	39.9118	21.0535			10.2819	20.1435	10.6129	12.9212	19.9075	21.3102	10.8635	15.8199
200	28.0885	42.2049	34.1102	34.6628	40.1532	49.1635	45.7145	28.3547			10.6849	21.8236	11.7772	15.5431	26.5044	24.0755	14.6531	31.9329
220	29.9272	47.5883	50.1061	46.1562	55.8	62.9791	51.9141	38.2483			11.0383	29.7441	16.2509	19.2204	34.7129	29.2211	20.2705	38.0261
240	41.1424	57.8317	64.1162	44.1911	77.4477	72.4611	61.1628	45.4307			11.683	36.4502	17.8026	23.7921	39.9356	36.1864	23.5246	50.7911
260	48.1796	70.968	85.4006	51.7871	82.5787	80.4734	86.3171	44.9274			16.5121	41.4401	25.5024	29.0496	42.9485	42.4158	31.8088	56.1249
280	46.0738	87.7882	90.9032	67.3991	109.407	101.75	103.864	61.2989			18.1123	49.8282	29.6586	35.9811	48.6648	53.2343	38.6268	72.0967
300	56.7424	90.836	111.469	72.2522	133.96	118.852	131.618	73.1364			22.6436	56.2639	30.5264	39.3583	52.6098	65.0693	47.3847	96.1729
320	64.6311	105.286	137.426	84.8318	146.423	131.01	155.114	70.0456			22.5521	69.5643	42.2279	54.0996	64.0667	70.3565	59.3167	105.623
340	68.3578	112.238	147.83	97.5367	157.118	147.64	170.14	76.1242			33.7038	74.6865	49.3261	59.8851	71.7915	93.189	72.9851	141.117
360	71.2036	122.127	156.771	108.602	166.684	143.636	203.544	83.3195			41.7872	92.7263	54.8001	67.3084	77.7624	116.952	78.7072	153.233
380	82.349	136.192	172.806	118.448	184.777	163.407	231.275	103.275			44.0817	101.767	64.5888	83.5786	88.3186	116.68	100.652	155.279
400	86.6346	143.451	195.029	136.535	200.239	174.359	236.497	114.861			61.6176	124.486	76.1899	92.5975	104.298	148.165	120.48	193.632
420	97.343	136.866	206.862	150.958	149.786	186.336	248.501	131.117			75.336	149.555	92.3016	109.588	115.199	135.664	133.523	229.035
440	109.593	151.84	194.925	165.502	226.779	196.736	261.514	119.304			93.1479	157.448	100.972	125.596	125.848	143.942	160.725	242.333
460	109.949	176.248	232.799	184.442	218.063	210.372	277.502	130.209			120.955	174.92	106.309	137.095	111.986	146.965	157.784	284.348
480	110.326	172.755	268.514	186.534	217.141	212.737	282.297	150.802			141.067	184.863	119.505	147.832	97.8279	153.406	148.582	293.494
500	108.417	188.123	291.212	196.31	208.907	219.299	283.228	133.792			162.563	205.592	132.089	160.019	118.82	168.106	104.986	250.839
520	100.074	204.135	301.56	196.286	217.703	197.234	279.561	146.728			176.498	238.156	140.173	148.299	135.767	167.433	80.4113	224.674
540	110.278	204.665	307.955	195.7	224.095	193.963	267.537	144.995			159.252	262.88	152.953	146.864	133.525	170.541	114.65	256.881
560	110.251	194.641	330.888	200.076	235.105	155.439	283.855	155.879			162.92	299.288	154.361	143.866	127.951	194.216	142.655	235.607
580	94.0982	198.991	288.106	239.953	220.093	144.143	262.246	150.526			174.108	298.177	161.203	146.738	120.285	172.426	165.99	229.664
600	103.152	161.52	247.133	230.695	221.198	149.08	243.349	136.695			154.921	337.879	176.308	133.565	112.945	181.433	134.577	262.482
620	120.022	213.214	223.159	249.398	216.752	156.414	275.194	138.912			166.129	358.188	165.406	130.973	124.865	184.446	121.744	299.878
640	133.637	218.661	214.283	245.461	247.062	175.399	288.708	140.056			170.15	354.944	183.101	137.252	131.474	183.117	112.071	283.612
660	129.588	210.526	230.82	237.576	210.621	170.503	311.854	149.137			164.212	334.815	200.997	110.992	157.789	155.11	111.991	286.392
680	120.638	206.722	227.476	260.285	203.278	169.542	319.183	136.84			189.047	326.376	227.068	96.0888	148.723	139.279	133.092	254.489
700	123.795	189.668	253.401	233.786	200.203	164.547	309.992	143.867			180.102	297.931	201.703	77.7598	138.967	126.836	123.761	285.749
720	129.379	174.353	232.511	187.224	171.697	146.663	285.655	147.084			171.486	283.939	203.475	49.1803	133.511	80.1306	114.197	270.107
740	114.64	150.386	191.771	157.276	126.841	115.873	214.258	137.664			191.186	272.608	201.699	44.2591	131.061	62.3784	106.361	256.684
760	108.501	121.836	131.924	121.285	86.903	96.0459	164.036	124.489			184.841	273.919	197.301		107.662		9.85739	235.951
780	65.8826	93.0308	99.0161	87.2068		70.162	102.377	111.696			189.379	243.367	193.603		124.636		43.6392	194.72
800	64.4739	81.8226	88.2604				81.5192	80.8848			189.763	180.599	201.535		114.442			145.726
