# Supplementary material for: Ndc1 drives nuclear pore complex assembly independent of membrane biogenesis to promote nuclear formation and growth
Source: eLife. 2022 Jul 19;11:e75513. doi: 10.7554/eLife.75513 (PMC9296133; doi:10.7554/eLife.75513)
Supplement: Figure 4—source data 1. [file elife-75513-fig4-data1.xlsx]

## Sheet: Source Data Fig 4D
nuclear volume of AB nuclei
time (s) relative to anaphase onset
0
20
40
60
80
100	control																				ndc1 RNAi							cnep-1 deletion
120
140
160
180
200	79.0625	79.0625		83.3253	88.5383	83.3253				114.852	98.9716	114.852	114.852	59.674	68.8722	86.7889	126.856	86.7889				41.512		30.8902	37.4893						86.7889	68.8722		86.7889
220	86.7889	98.9716	79.0625	106.658	128.84	87.6622			98.9716	126.526	104.796	120.642	114.852	79.0625	86.7889	98.9716	139.932	114.852				51.4136		45.9038	51.4136				79.0625		98.9716	87.6622		99.8838
240	98.9716	98.9716	83.3253	114.852	131.835	113.26	98.9716	126.856	114.852	156.957	120.642	156.957	139.932	98.9716	114.852	114.852	175.354	120.642				59.674		51.4136	59.674			98.9716	86.7889		114.852	120.642	98.9716	139.932
260	114.852	114.852	114.852	139.932	138.232	120.642	126.856	139.932	139.932	165.89	139.932	175.354	156.957	126.856	126.526	126.856	187.616	126.856				68.8722	81.8961	59.674	68.8722			126.856	114.852	98.9716	156.957	126.856	126.856	148.189
280	126.856	126.856	114.852	175.354	148.189	139.932	156.957	148.189	156.957	175.354	156.957	187.616	179.041	139.932	131.835	139.932	187.616	156.957				79.0625	91.4796	79.0625	68.8722			139.932	126.856	114.852	175.354	139.932	139.932	175.354
300	156.957	139.932	126.856	175.354	165.89	175.354	175.354	175.354	179.041	211.778	187.616	211.778	211.778	156.957	156.957	156.957	211.778	175.354			93.8556	86.7889	93.2597	79.0625	79.0625			175.354	156.957	139.932	187.616	165.89	175.354	199.383
320	173.521	175.354	156.957	187.616	187.616	187.616	211.778	187.616	187.616	231.234	211.778	231.234	219.651	175.354	175.354	175.354	231.234	187.616			98.9716	86.7889	104.177	86.7889	86.7889			187.616	165.89	156.957	211.778	187.616	211.778	211.778
340	179.041	187.616	175.354	211.778	209.825	211.778	231.234	211.778	231.234	252.081	231.234	231.234	231.234	187.616	187.616	211.778	252.081	211.778			114.852	98.9716	113.896	93.8556	98.9716			231.234	175.354	165.89	252.081	211.778	231.234	230.831
360	211.778	211.778	187.616	211.778	209.825	252.081	252.081	231.234	239.745	262.937	231.234	277.79	251.666	231.234	211.778	231.234	277.79	231.234			120.642	126.856	141.64	114.852	98.9716			258.743	187.616	187.616	277.79	219.651	239.745	272.241
380	231.234	231.234	187.616	231.234	230.831	277.79	252.081	252.081	277.79	298.159	252.081	284.238	272.241	239.745	231.234	252.081	298.159	252.081			126.856	126.856	146.802	114.852	114.852			327.109	219.651	211.778	298.159	239.745	277.79	298.159
400	252.081	252.081	211.778	252.081	277.79	277.79	277.79	272.241	284.238	298.159	298.159	284.238	284.238	252.081	252.081	252.081	298.159	277.79			131.835	126.856	149.581	126.856	120.642			327.109	239.745	231.234	327.109	277.79	298.159	324.85
420	262.937	252.081	211.778	277.79	284.238	284.238	298.159	284.238	284.238	344.903	298.159	312.299	299.475	277.79	277.79	277.79	298.159	298.159			138.232	139.932	154.837	139.932	120.642			344.903	277.79	277.79	344.903	298.159	312.299	362.54
440	298.159	277.79	231.234	298.159	284.238	284.238	312.299	299.475	298.159	344.903	327.109	327.109	312.299	298.159	284.238	277.79	327.109	327.109			165.89	156.957	165.89	139.932	126.856			344.903	298.159	277.79	380.945	327.109	327.109	395.789
460	298.159	277.79	239.745	298.159	299.475	327.109	312.299	327.109	336.651	362.54	327.109	327.109	336.651	298.159	284.238	298.159	349.978	327.109			173.521	156.957	173.521	148.189	139.932			344.903	327.109	327.109	411.309	344.903	344.903	435.456
480	312.299	284.238	239.745	327.109	299.475	344.903	344.903	344.903	344.903	362.54	380.945	344.903	336.651	327.109	284.238	298.159	380.945	344.903			179.041	156.957	179.041	156.957	139.932			395.789	344.903	327.109	425.051	380.945	380.945	456.011
500	327.109	298.159	252.081	344.903	312.299	362.54	362.54	344.903	362.54	411.309	380.945	362.54	349.978	336.651	327.109	344.903	411.309	362.54			179.041	165.89	199.383	156.957	156.957			426.038	411.309	344.903	435.456	411.309	411.309	456.011
520	327.109	298.159	277.79	344.903	324.85	380.945	362.54	380.945	411.309	411.309	380.945	362.54	365.352	344.903	327.109	344.903	411.309	380.945			179.041	165.89	209.825	156.957	175.354			456.011	435.456	380.945	477.392	435.456	435.456	477.392
540	344.903	327.109	298.159	380.945	324.85	395.789	362.54	380.945	411.309	411.309	411.309	411.309	380.469	362.54	344.903	344.903	425.051	380.945			211.778	175.354	209.825	156.957	175.354			491.827	456.011	411.309	509.022	477.392	456.011	477.392
560	344.903	327.109	298.159	380.945	380.945	395.789	380.469	380.945	411.309	411.309	411.309	411.309	380.469	362.54	344.903	344.903	435.456	411.309			211.778	188.744	230.831	175.354	175.354			525.354	477.392	411.309	546.679	509.022	477.392	490.791
580	362.54	327.109	298.159	380.945	395.789	411.309	380.469	411.309	425.051	435.456	411.309	411.309	380.469	380.945	380.945	380.945	435.456	425.051			211.778	199.383	252.081	187.616	175.354			525.354	509.022	435.456	621.266	546.679	509.022	509.022
600	380.945	344.903	298.159	411.309	395.789	411.309	380.469	411.309	435.456	435.456	411.309	411.309	380.469	411.309	411.309	380.945	435.456	435.456			211.778	231.234	252.081	199.383	187.616			525.354	509.022	435.456	621.266	584.124	509.022	546.679
620	380.945	344.903	327.109	411.309	395.789	435.456	395.789	411.309	435.456	435.456	411.309	411.309	395.789	439.442	411.309	380.945	435.456	435.456			231.234	231.234	252.081	199.383	187.616			525.354	509.022	435.456	642.668	584.124	525.354	546.679
640	380.945	344.903	327.109	411.309	395.789	435.456	435.456	411.309	435.456	435.456	411.309	411.309	395.789	435.456	411.309	380.945	435.456	435.456			231.234	231.234	262.937	211.778	211.778			525.354	509.022	525.354	642.668	600.106	525.354	546.679
660	395.789	344.903	344.903	435.456	395.789	435.456	435.456	411.309	435.456	435.456	411.309		395.789	477.392	411.309	435.456	435.456	435.456			252.081	231.234	262.937	211.778	211.778			525.354	509.022	525.354	642.668	620.706	525.354	546.679
680	411.309	344.903	344.903	435.456	435.456	435.456	435.456	435.456	435.456					477.392	435.456	435.456	435.456	435.456			252.081	239.745	262.937	211.778	211.778			525.354	509.022	546.679	642.668	620.706	546.679	546.679
700	411.309	344.903	344.903	435.456	435.456	435.456	435.456	435.456	435.456					477.392	435.456	435.456		435.456			252.081	239.745			211.778			525.354	509.022	546.679	642.668	620.706	546.679
720	411.309	344.903	344.903	435.456	435.456	435.456	435.456	435.456						477.392	435.456	435.456		435.456			252.081	239.745							509.022	546.679		620.706	546.679
740	411.309				435.456			435.456						477.392	435.456						252.081									546.679			546.679

## Sheet: Source Data Fig 4F
nuclear volume of AB nuclei
time (s) relative to anaphase onset
0
20
40
60
80
100
120	npp-22 RNAi												cnep-1 deletion + ndc1 RNAi
140
160
180		30.8902
200		37.4893		59.674
220		45.9038	59.674	68.8722
240		51.4136	68.8722	79.0625				59.674
260		68.6034	86.7889	98.9716	59.674			59.674
280		86.7889	98.9716	98.9716	59.674			64.0869		79.0625
300	86.7889	86.7889	114.852	114.852	79.0625	93.8556	93.8556	68.8722		93.8556			94.1541	104.486					93.8556		86.7889
320	86.7889	98.9716	131.835	126.856	86.7889	114.852	93.8556	79.0625		114.852			86.7889	114.852	78.781				104.796		98.9716
340	86.7889	114.852	148.189	131.835	93.8556	126.856	99.8838	86.7889	130.501	120.642			93.8556	120.642	86.7889			114.852	113.26	114.852	114.852	111.993
360	98.9716	126.856	156.957	139.932	98.9716	126.856	106.658	86.7889	139.932	120.642			98.9716	139.932	98.9716	131.835		120.642	113.26	126.856	120.642	138.232
380	126.856	139.932	175.354	175.354	114.852	139.932	113.26	98.9716	139.932	126.856			120.642	148.189	114.852	113.26	165.89	139.932	120.642	139.932	126.856	148.189
400	126.856	156.957	187.616	175.354	126.526	148.189	120.642	98.9716	139.932	148.189			139.932	156.957	126.856	131.835	173.521	158.02	126.526	156.957	139.932	148.189
420	131.835	156.957	211.778	187.616	139.932	165.89	120.642	114.852	139.932	147.495			156.957	156.957	139.932	131.835	179.041	179.041	138.232	175.354	156.957	156.957
440	148.189	165.89	231.234	187.616	156.957	165.89	126.856	120.642	156.957	181.265			175.354	188.744	156.957	139.932	199.383	199.383	138.232	211.778	165.89	165.89
460	158.02	165.89	231.234	211.778	156.957	165.89	139.932	126.856	156.957	199.383			187.616	188.744	199.383	156.957	219.651	211.778	138.232	230.831	179.041	175.354
480	165.89	165.89	231.234	231.234	165.89	179.041	156.957	139.932	156.957	199.383			211.778	230.831	211.778	175.354	231.234	219.651	175.354	252.081	188.744	187.616
500	175.354	175.354	252.081	252.081	175.354	179.041	156.957	139.932	175.354	197.087			231.234	240.561	231.234	187.616	231.234	252.081	187.616	262.937	209.825	211.778
520	175.354	179.041	252.081	252.081	187.616	179.041	165.89	156.957	175.354	207.101			252.081	258.743	231.234	219.651	239.745	262.937	231.234	277.79	230.831	231.234
540	187.616	187.616	252.081	252.081	187.616	179.041	173.521	175.354	187.616	207.101			252.081	272.241	252.081	219.651	262.937	277.79	252.081	298.159	230.831	239.745
560	199.383	187.616	252.081	277.79	211.778	187.616	179.041	179.041	187.616	207.101			277.79	284.238	252.081	231.234	277.79	284.238	262.937	327.109	240.561	239.745
580	219.651	211.778	252.081	277.79	211.778	187.616	187.616	187.616	211.778	218.859			277.79	298.159	262.937	239.745	284.238	284.238	277.79	327.109	240.561	277.79
600	219.651	211.778	277.79	277.79	231.234	187.616	199.383	199.383	211.778	230.831			284.238	298.159	277.79	239.745	298.159	284.238	277.79	327.109	262.937	277.79
620	231.234	231.234	277.79	277.79	231.234	199.383	199.383	219.651	211.778	230.831			298.159	298.159	277.79	239.745	298.159	284.238	284.238	336.651	272.241	277.79
640	239.745	231.234	277.79	277.79	239.745	211.778	230.831	219.651	211.778	230.831			298.159	298.159	277.79	252.081	298.159	284.238	284.238	336.651	298.159	298.159
660	239.745	252.081	277.79	277.79	239.745	211.778	230.831	219.651	231.234				298.159	298.159	298.159	262.937	298.159	284.238	284.238	336.651	298.159	298.159
680	239.745	252.081	277.79	277.79	239.745	231.234	230.831	219.651	231.234				298.159	327.109	298.159	262.937	298.159			336.651	298.159	298.159
700		252.081	277.79	277.79	239.745	231.234	230.831	231.234	252.081				298.159	327.109	298.159	262.937	298.159			336.651	298.159	312.299
720				277.79	239.745	231.234	230.831	231.234	252.081				298.159	327.109	298.159	262.937	298.159			336.651	298.159	312.299
740					239.745		230.831		252.081						298.159	277.79					298.159	312.299
															298.159	277.79					298.159	312.299

## Sheet: Source Data Fig 4H
Nuclear to cytoplasmic ratios
Ratio is then multiplied by nuclear area
Time (s) relative to anaphase onset
The same, control and ndc1 RNAi values were used from figure 2	Control																						ndc1 RNAi																	cnep-1 deletion									cnep-1 deletion+ndc1 RNAi
0	6.70052	7.33778	12.2881	7.04865	10.4717	5.17666	5.90284	8.86447	10.2782	8.59493	7.30577	14.1269	10.0328	7.78683	10.8014	15.9762	11.09	6.83089	6.28411	10.641			5.83298	7.36444	9.45178	6.24265	5.00831	5.40775	8.87917	6.96713	7.30702	7.22602	9.13062	6.79052	6.06263	8.87927	7.3273			12.893	11.3526	14.0633	9.86003	7.95819	9.2096	9.2797			11.0188
20	8.67759	9.0842	8.72505	7.30477	8.34824	5.98763	6.73078	10.4959	10.2994	6.35793	9.48438	11.1971	10.668	6.53776	8.16359	10.9558	10.2537	8.68986	6.63348	8.10567			6.64859	11.2048	9.09893	5.5111	6.17654	7.08519	7.5686	5.91108	8.44704	6.40519	8.35247	6.3013	5.61194	7.09272	8.27798			11.5122	13.0754	14.7941	8.25591	7.37867	9.65331	11.7132			8.61529
40	8.45994	7.34946	11.2361	7.54504	9.04775	6.91854	7.13297	10.3511	10.7791	6.96005	8.02342	9.74326	9.68967	7.94794	9.852	10.4998	9.65403	5.05048	6.6955	7.57945			7.19027	7.1039	9.0554	5.90053	5.16918	7.91654	5.10829	4.23322	6.94546	5.56592	7.69641	5.13022	7.93728	8.97881	6.09398			9.19224	9.81534	7.79773	8.41988	9.98389	9.25586	8.61936			10.0194
60	9.46374	10.8028	8.64451	9.15187	9.81376	7.0518	7.00585	9.90698	10.3474	7.38839	7.46048	9.547	9.38425	6.31638	8.3903	9.17915	8.9309	6.49838	9.45491	9.59234			8.50946	7.39562	8.32932	5.4841	5.43221	8.15686	6.16522	4.48363	7.97063	6.20696	8.49959	5.00628	7.96125	10.108	6.91661			9.44707	9.71803	10.801	8.4602	9.70201	8.20501	10.2366			8.51667
80	10.4797	12.4177	11.2939	16.1381	11.1989	9.43419	8.28769	11.311	13.3211	8.67772	8.98107	11.4595	9.83297	9.29077	9.06572	11.0341	15.5598	8.60063	16.0433	18.8523			9.65991	7.43023	8.3462	6.49636	6.65805	7.44394	6.85572	6.55281	7.93843	7.77816	8.72665	6.44646	8.08702	8.52877	7.36271			9.85161	10.098	11.0211	7.10802	11.2264	7.96356	10.8537			8.14367
100	19.1859	21.7926	19.1107	21.8457	19.552	14.4418	13.201	15.74	22.1471	14.3147	14.7228	20.5729	11.6203	16.4624	12.4703	24.0311	23.4586	15.7168	19.4225	28.0577			10.4067	10.9421	12.455	10.4377	6.32359	9.13897	7.5316	10.1362	14.0717	5.9649	9.19369	6.28434	8.93109	8.16089	8.98892			10.4993	11.4205	11.6833	9.26718	10.8994	9.90387	14.8721			7.92821
120	23.5013	26.432	27.4853	24.4972	28.8335	21.7051	22.5474	22.6053	30.6712	18.3639	20.1924	28.4911	20.4195	24.3599	19.8686	34.6683	29.3259	24.9664	29.2809	31.7239			9.21087	15.0935	16.4764	13.3788	10.117	12.6518	8.57121	11.9885	19.5609	8.32309	10.1229	6.94445	10.8427	10.1075	11.9308			16.9508	15	13.8137	13.7701	18.2713	12.5417	26.0422			8.98297
140	33.624	42.8382	39.453	38.4267	37.7089	28.2423	30.8474	30.3888	41.8261	23.2174	26.961	42.0226	27.2766	33.5019	28.008	46.58	40.2783	38.374	44.4777	51.8565			14.8345	15.7687	21.2114	15.4208	12.8594	16.7751	12.5282	15.1493	27.125	10.121	13.3328	7.76094	15.0067	16.1267	15.809			25.5583	21.9555	18.5476	21.888	21.1959	14.1973	33.7336			10.1184
160	39.8107	56.1425	63.0418	48.6779	44.0147	40.797	46.7825	47.7727	62.3894	33.3079	38.5393	52.2655	36.4373	38.7284	39.1533	50.8539	50.9039	50.1891	46.4173	66.0505			19.987	23.0137	28.3736	20.6492	15.5309	26.5974	17.8154	23.4696	30.6457	13.0413	15.8024	10.1537	20.4896	21.1025	24.6205			35.0992	31.35	29.2678	27.4237	35.6461	24.6499	40.3452			11.9135
180	50.2239	69.436	76.6193	72.7751	50.1294	49.8371	62.2915	59.0669	79.0995	45.37	50.0597	67.9271	44.7472	49.9639	43.6891	91.4429	50.1	55.2917	52.2307	91.4272			28.0481	31.9566	33.1417	28.3813	23.1226	30.854	20.0578	36.8504	48.7589	17.6405	20.8753	17.4118	23.4614	22.6038	35.8889			44.4635	41.5229	37.7072	38.8065	44.5854	30.7738	53.3973			15.186
200	64.2477	82.7961	90.7298	88.6821	70.6927	64.0121	83.1566	65.6795	98.0929	53.1581	56.7546	84.8701	53.2934	48.9985	57.8835	114.247	67.6274	74.8024	67.9033	117.897			27.7049	36.5312	45.0458	30.8088	28.2913	39.6433	23.6366	37.6126	56.7052	20.1766	23.3237	20.4299	28.6601	23.894	46.5889			53.5446	58.7057	57.0972	42.8251	48.5813	35.0967	64.3427			17.9301
220	88.8583	99.3048	98.3845	107.901	99.875	78.3285	98.8936	70.8129	107.725	65.1076	77.6827	106.389	53.3717	68.1501	69.0215	143.999	79.2547	88.4374	74.5739	133.45			48.0812	54.0152	53.2264	46.1466	42.3136	46.2136	29.15	52.4445	70.1364	24.2061	31.1839	31.4084	29.8228	30.5313	51.1478			65.6794	55.0348	57.3958	50.9678	66.4391	43.6862	75.7695			30.1949
240	114.596	139.476	133.648	130.004	114.476	104.955	124.054	86.3523	110.104	76.9819	85.2511	126.347	71.8017	70.6337	82.5081	176.997	93.7727	99.3509	94.864	152.389			56.4917	67.9542	64.7298	54.3342	54.1727	58.486	36.27	62.7523	85.9021	29.0042	38.6379	31.0964	37.4068	36.4585	68.5367			75.1861	65.2973	66.9979	57.7198	77.7773	48.3634	97.2587			38.2107
260	127.512	163.617	156.785	141.468	133.597	139.853	143.561	95.8581	133.039	93.9222	99.4479	141.91	82.2835	84.9103	92.268	224.645	112.825	111.404	114.125	176.595			76.7562	92.1981	84.4743	67.2217	71.4995	64.1004	53.023	90.1503	116.598	31.3917	43.0187	44.7103	42.0438	43.9021	95.4538			93.952	84.2583	87.5315	74.9398	82.3728	62.8063	115.976			44.931
280	156.142	175.553	173.107	155.059	158.563	165.485	175.228	110.084	137.939	102.396	130.836	160.31	95.2995	112.17	102.079	215.692	131.123	129.203	140.44	192.149			85.7001	105.324	113.143	85.0857	87.6322	73.0823	63.8414	106.441	129.617	33.0877	62.3194	62.8988	50.9034	61.6381	115.36			114.596	95.086	106.332	82.0261	98.0943	71.1992	146.775			61.5724
300	159.168	217.134	202.376	182.496	172.819	177.649	190.267	125.148	175.05	120.43	137.85	178.653	112.419	145.793	124.648	271.222	167.674	158.481	154.033	255.1			120.307	126.047	119.473	94.5058	107.771	94.823	79.0988	123.442	145.663	47.2802	69.8374	72.5223	58.0959	70.6689	145.025			133.526	115.147	134.23	83.2035	111.018	86.1207	189.836			70.8999
320	182.012	237.397	241.213	206.278	178.303	203.26	235.569	157.847	219.971	151.181	153.576	217.994	132.058	156.187	138.732	299.167	207.13	182.951	180.074	270.855			149.696	136.895	141.025	123.35	122.922	107.353	88.8157	151.575	191.018	58.2724	84.5338	79.2963	71.2729	85.0909	172.844			149.963	127.522	150.198	102.194	122.482	100.433	205.298			70.8867
340	185.812	262.33	274.559	242.208	210.583	231.911	260.184	162.791	245.45	169.515	182.356	244.031	148.575	164.884	169.445	349.356	234.798	191.122	216.259	302.173			159.762	175.548	163.449	138.646	151.194	118.054	109.097	173.571	206.057	65.3644	113.125	87.5982	81.8926	96.8017	215.323			159.137	125.786	171.409	116.222	126.57	113.395	232.641			94.5364
360	219.839	305.561	308.093	266.167	241.135	256.496	282.992	212.028	302.565	193.174	179.855	256.843	183.749	232.997	193.008	356.195	284.433	191.878	274.441	340.11			192.647	195.736	202.495	182.249	166.541	137.296	113.671	185.059	228.558	90.0725	114.132	103.087	79.4905	142.164	205.477			178.456	172.157	201.571	128.728	137.615	117.113	275.837			110.605
380	227.815	319.413	358.173	276.79	260.932	297.156	304.088	264.741	334.016	201.977	216.735	305.164	195.759	249.48	213.861	408.821	303.22	237.325	308.437	379.623			245.471	216.68	217.861	185.954	188.538	159.694	130.826	191.778	265.219	104.966	135.828	117.085	90.4824	155.642	204.216			226.315	211.707	199.888	132.909	163.04	138.637	295.588			141.617
400	263.523	324.034	383.046	283.173	275.513	345.849	343.274	319.952	365.422	257.75	234.678	346.347	206.164	285.806	248.466	430.348	316.497	276.366	300.567	346.374			225.267	247.981	218.128	232.748	204.563	159.612	149.132	203.992	288.539	111.39	164.209	128.833	86.3103	147.876	349.866			239.299	202.862	246.786	145.51	183.928	155.726	315.612			165.077
420	300.598	354.482	404.877	285.071	283.729	390.687	362.382	355.096	410.732	254.323	259.188	388.521	213.845	314.417	264.76	486.86	404.141	274.339	320.149	325.141			231.159	262.481	238.959	316.192	222.903	184.502	163.798	221.331	315.347	126.247	164.864	138.894	97.8965	170.136	394.785			246.727	279.888	301.956	147.077	184.571	168.157	322.5			184.418
440	303.119	372.893	465.616	308.048	313.176	431.351	343.476	360.817	431.078	265.078	299.564	398.658	228.977	369.073	312.63	531.539	403.482	286.392	334.156	378.354			317.367	278.478	277.477	300.125	229.563	194.265	192.066	220.263	338.554	126.273	196.929	156.945	107.186	163.963	403.025			217.644	315.257	348.734	155.533	204.514	187.338	330.315			213.595
460	309.868	349.888	484.884	330.723	278.177	436.353	354.07	381.296	445.549	276.971	305.321	430.094	262.348	365.378	335.677	584.166	437.978	282.289	276.897	359.309			320.501	318.182	292.154	430.138	250.543	182.827	205.147	223.03	349.384	122.167	199.215	166.145	112.944	175.336	404.723			216.326	309.644	363.968	158.462	198.698	187.496	339.793			233.69
480	338.458	337.543	440.02	309.022	299.434	420.357	322.917	405.228	427.526	286.519	338.535	404.766	282.725	360.49	414.505	569.633	366.598	296.737	300.231	322.964			358.506	334.273	288.421	461.32	248.551	196.244	193.989	230.799	392.047	147.362	199.246	170.146	121.854	188.448	322.047			342.925	323.973	364.733	166.296	210.397	222.417	331.599			259.641
500	342.631	342.483	444.713	320.173	304.569	446.174	336.917	395.469	446.994	247.973	321.962	439.303	290.788	386.03	453.907	514.402	348.971	305.454	265.542	280.72			341.36	350.667	305.984	321.858	255.98	166.363	204.801	214.185	407.836	157.396	206.93	188.294	121.925	169.942	276.634			349.064	326.616	362.749	167.095	201.112	227.951	313.411			305.219
520	320.919	395.386	414.551	313.898	336.303	437.034	288.829	353.03	392.667	231.647	320.736	408.409	308.829	323.44	405.114	447.039	302.667	297.554	322.205	281.184			354.343	295.03	310.497	220.919	269.977	150.695	182.62	198.561	361.331	157.897	181.051	183.997	131.14	192.699	235.076			358.67	329.387	387.503	172.92	195.224	222.486	295.081			320.099
540	351.153	397.897	435.472	325.553	314.966	405.951	339.807	297.039	342.682	207.37	277.835	347.059	282.865	344.426	362.182	423.557	281.114	331.953	275.536	309.558			324.119	332.544	298.917	222.964	194.153	147.765	191.569	195.077	296.064	161.634	148.14	171.424	153.982	176.657	253.884			324.863	348.445	396.406	203.232	209.971	232.812	251.491			344.461
560	399.983	399.918	407.621	321.743	334.879	310.563	323.72	301.1	329.114	187.576	269.417	362.59	274.722	259.226	326.747	477.702	275.288	334.865	299.9	284.211			320.154	354.171	345.305	235.839	164.415	155.887	167.939	207.705	265.74	164.445	141.724	168.159	137.359	193.573	218.745			284.546	370.478	371.655	218.121	226.817	224.848	250.686			327.135
580	351.539	408.03	373.739	260.028	327.289	294.632	288.271	302.011	347.424	178.98	238.363	326.031	248.315	240.298	295.172	429.374	291.486	311.019	271.795	276.009			297.951	321.139	328.714	276.413	178.809	162.869	190.928	200.531	243.416	151.626	130.959	194.355	129.617	195.98	236.798			272.805	394.058	372.195	236.322	253.737	242.832	225.802			287.524
600	290.678	425.939	398.302	271.712	326.368	285.418	271.437	323.426	343.434	188.36	260.509	338.874	258.29	277.605	283.746	406.228	284.025	261.458	234.561	254.82			288.495	327.312	252.841	275.662	184.657	165.035	174.639	202.174	270.845	145.173	158.235	179.658	148.681	200.148	169.104			286.162	368.664	341.95	238.857	296.29	244.085	231.084			235.511
[truncated: 9 more columns]

## Sheet: Source Data Fig 4J
pronculear volume at -100s relative to pcr
Embryo
	nup53 RNAi		nup53 RNAi +cnep-1 deletion		nup153 RNAi		nup153 RNAi + cnep-1 deletion		ndc1 RNAi		ndc1 RNAi + cnep-1 deletion
1	21.5726		21.7891		82.6772		82.6772		99.541		189.787
2	26.0941		15.6903		82.6772		88.0675		139.848		172.007
3	12.4576		26.0941		63.3137		72.5654		88.0675		189.787
4	13.9963		21.5009		93.6872		58.9984		111.97		228.941
5	23.8905		17.481		63.3137		72.5654		118.555		155.373
6	31.2989		13.9963		50.965		77.5114		118.555		218.692
7	28.6374		26.0941		67.8344		67.8344		77.5114		163.549
8	13.9963		11.0084		77.5114		93.6872		77.5114		172.007
9	17.481		11.0084		43.6961		105.634		93.6872		228.941
10	31.2989								88.0675
11
