# Supplementary material for: Ndc1 drives nuclear pore complex assembly independent of membrane biogenesis to promote nuclear formation and growth
Source: eLife. 2022 Jul 19;11:e75513. doi: 10.7554/eLife.75513 (PMC9296133; doi:10.7554/eLife.75513)
Supplement: Figure 5—source data 1. [file elife-75513-fig5-data1.xlsx]

## Sheet: Source Data Fig 5B
Percent Embryonic Lethality Data
Worm Number	Control		ndc1 RNAi		nup53, tm2886 allele		nup53, tm2886 allele+ndc1 RNAi
1	0		0.787402		61.7978		77.0642
2	0.775194		3.93701		43.5484		40
3	0		8.92857		47.8261		100
4	3.77358		5.94059		42.8571		95.8333
5	2.4		0.877193		33.3333		99.0385
6	0.819672		1.6129		24.0385		86.8217
7	2.30769		0.833333		99.1228		92.3729
8	0		1.7094		62.5		100
9	1.16279		1.2987		56.5217		100
10	0.689655		3.2967		70.1493		55.814
11	2.89855		0.900901		42.9688		60.396
12	0.649351		0.847458		52.4194		74.6032
13	0.653595		0		63.0631		73.2759
14	1.3986		0		66.2252		97.541
15					48.951		99.0566
16							56.9106
17							51.1111
18							92.126
19							100

## Sheet: Source Data Fig 5E
pronuclear diameter at -100s relative to PCR
Embryo	Control	nup53 RNAi	nup53, tm2886	nup53, tm2886+Ndc1 RNAi	nup155 RNAi
1	8.05	3.68	4.6	2.99	2.99
2	8.28	4.83	3.22	2.07	2.18651
3	7.36	4.14	4.14	2.07	4.6
4	8.05	4.83	3.79587	4.83	2.3
5	7.59	3.45	4.6	2.3	2.07
6	8.05	4.14	4.37	2.07	2.18651
7	7.82	3.45	4.83	2.07	2.07
8	8.05	5.29			2.3
9	8.28	3.45			2.76
10	8.51	3.45			2.42734
11	8.28	4.6			3.56593
12	7.59
13	7.82				2.07639
14	7.59				3.22
15	8.05				2.07
16	8.05				2.18651
17	7.59				2.30575
18	8.1654				2.07
19	8.05				2.18651
20	8.2816				2.3
21					2.53
22					2.07
23					2.3
24					2.30575

## Sheet: Source Data Fig 5G
pronuclear diameter from IF images
Nuclei		Ndc1 KO	Ndc1 KO+Nup53 RNAi	nup155 RNAi
1		3.07437	2.07	1.61
2		2.76	2.07	2.07
3		4.96173	1.84	1.84
4		2.3	1.72692	1.61
5		3.68	1.84	2.07
6		5.2925	1.61	1.84
7		2.99	1.61	1.95669
8		5.29	1.84	1.84
9		2.19864	1.84	1.84
10		4.14	1.61	1.72692
11		5.5224	1.95669	1.84719
12		4.72131	1.61	2.07
13		5.19098	1.72692	1.95669
14		5.06261	1.61	1.95669
15		4.37	2.64625	1.84
16		2.88536	1.84	1.84
17		6.44	1.72692	2.07639
18		1.61	1.84	2.3
19		2.30575		1.95669
20		5.29		2.18651
21				2.07
22				1.84
23				2.18651
24				2.07639
25				1.95669
26				2.07
27				1.84
28				1.95669
29				1.84
30				2.07

## Sheet: Source Data Fig 5H
Nuclear Apperance from IF samples,
juded by mAb414 staining
		Normal NE	Faint NE	Punctate NE	No NE
	cntrl	100	0	0	0
	Ndc1 KO	100	0	0	0
	Nup53 RNAi	0	0	100	0
	Ndc1 KO+Nup53 RNAi	0	11.111	27.77	61.11
	nup155 RNAi	0	3.333	26.666	70
